# Supplementary material
Source: MDPI journal article supplement (https://www.mdpi.com/1424-8247/16/4/525)
Supplement: s1 [file s1]

## Supplementary Data

# **Glycoconjugates of mucochloric acid – synthesis and biological activity**

Katarzyna Żurawska 1,2, Daria Burdalska 1, Magdalena Skonieczna 2,3,\* , Anna Byczek-Wyrostek 2, Anahit Dawicka 2,3, Anna Kasprzycka 1,2,\* and Krzysztof Walczak 1

<sup>1</sup> Department of Organic Chemistry, Bioorganic Chemistry and Biotechnology, Faculty of Chemistry, Silesian University of Technology, Krzywoustego Street 4, 44-100 Gliwice, Poland

<sup>2</sup> Biotechnology Centre, The Silesian University of Technology, Krzywoustego Street 8, 44-100 Gliwice, Poland

<sup>3</sup> Department of Systems Biology and Engineering, The Silesian University of Technology, Akademicka Street 16, 44-100 Gliwice, Poland

\*Correspondence: magdalena.skonieczna@polsl.pl (M.S.); anna.kasprzycka@polsl.pl (A.K.)

## **Content:**

- |                                                                                                                                                  |            |
|--------------------------------------------------------------------------------------------------------------------------------------------------|------------|
| <b>1. NMR spectra</b>                                                                                                                            | <b>S2</b>  |
| <b>2. Figure S1. Survival fraction of HCT116 and MCF7 cell lines after 72-hours of incubation with tested compounds, evaluated by MTT assay.</b> | <b>S17</b> |

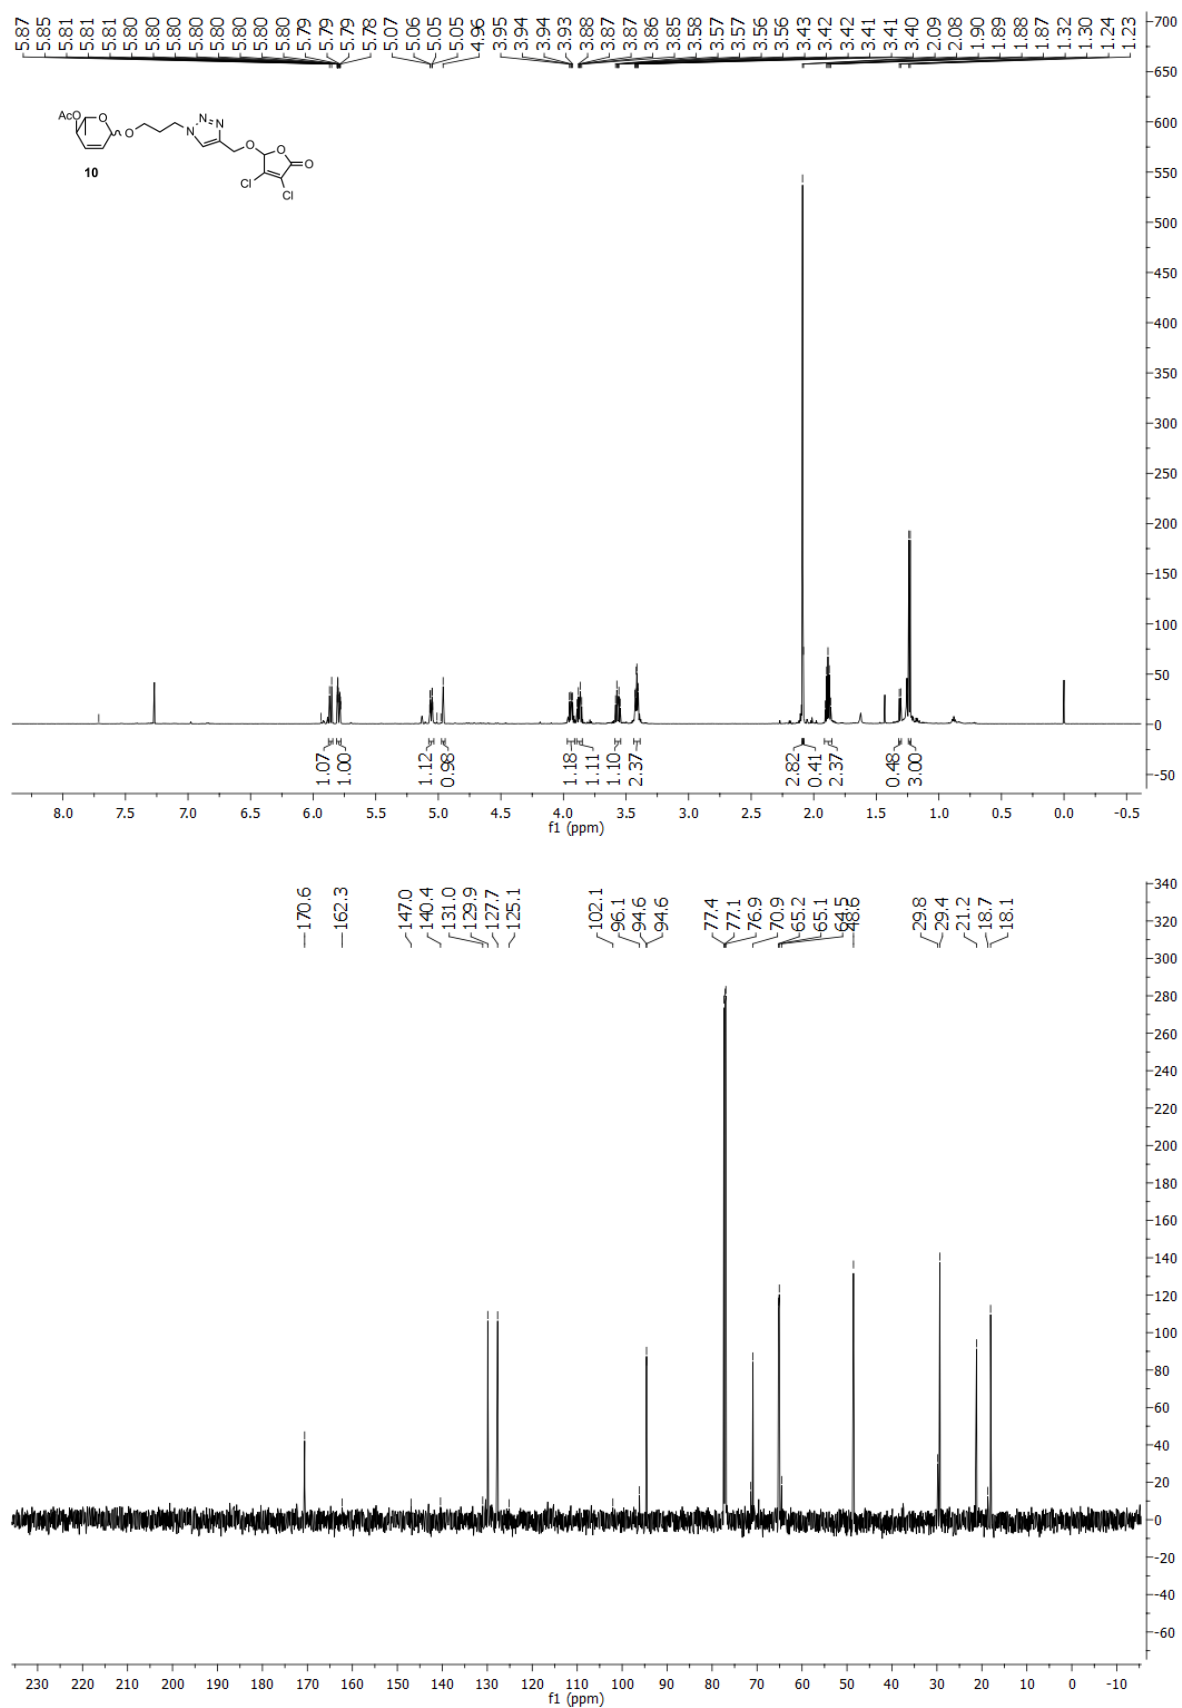

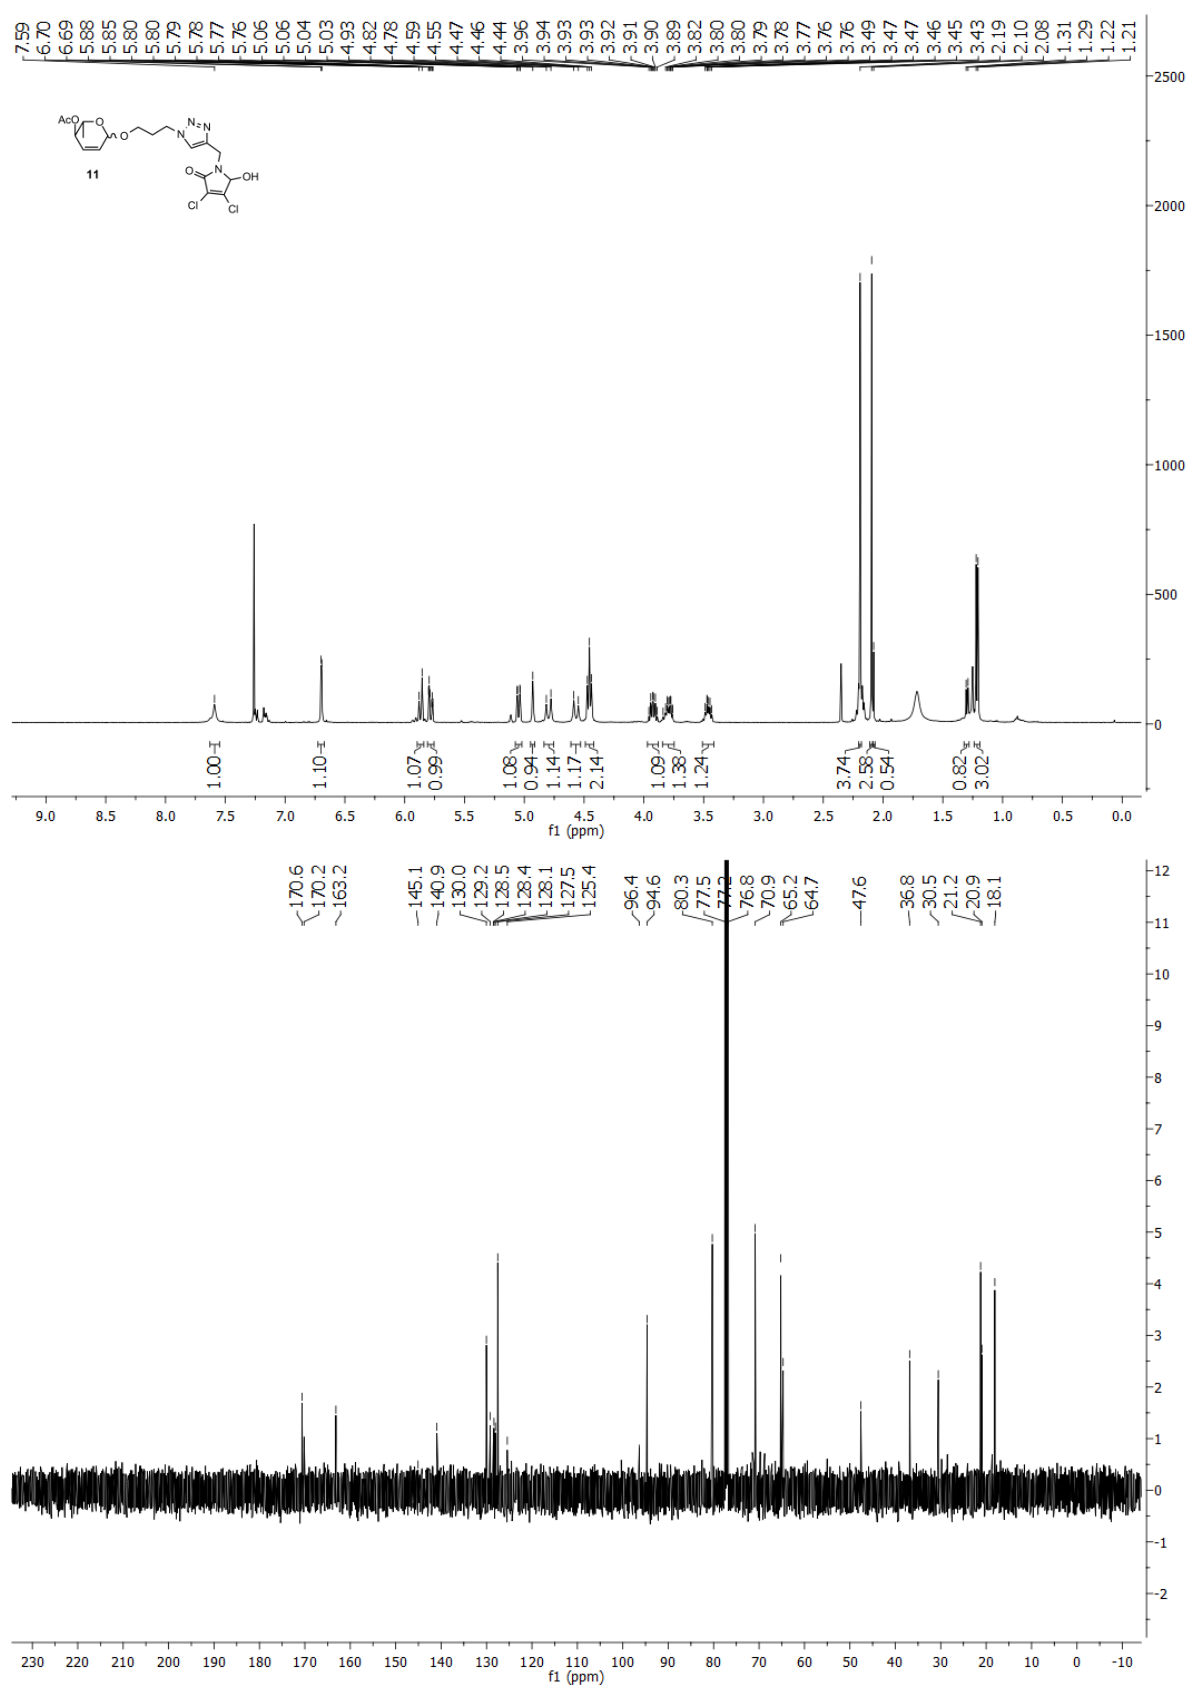



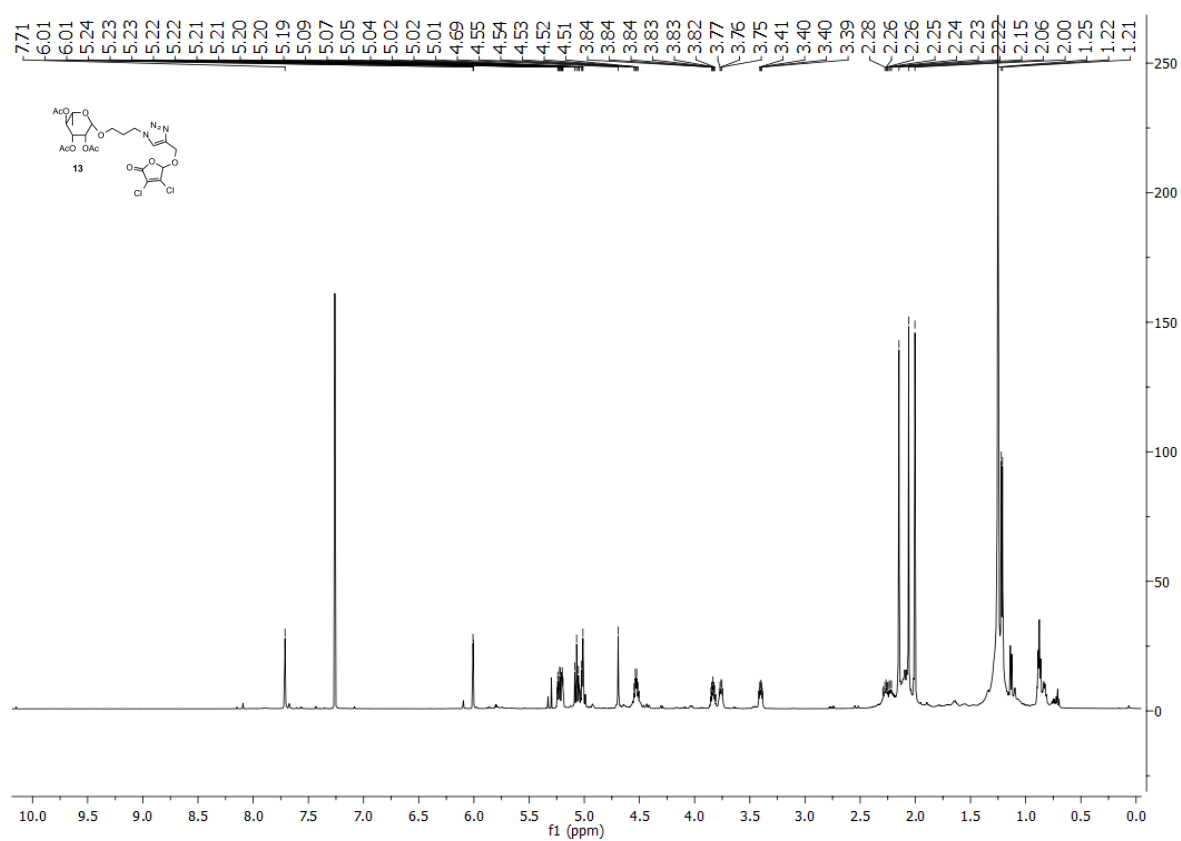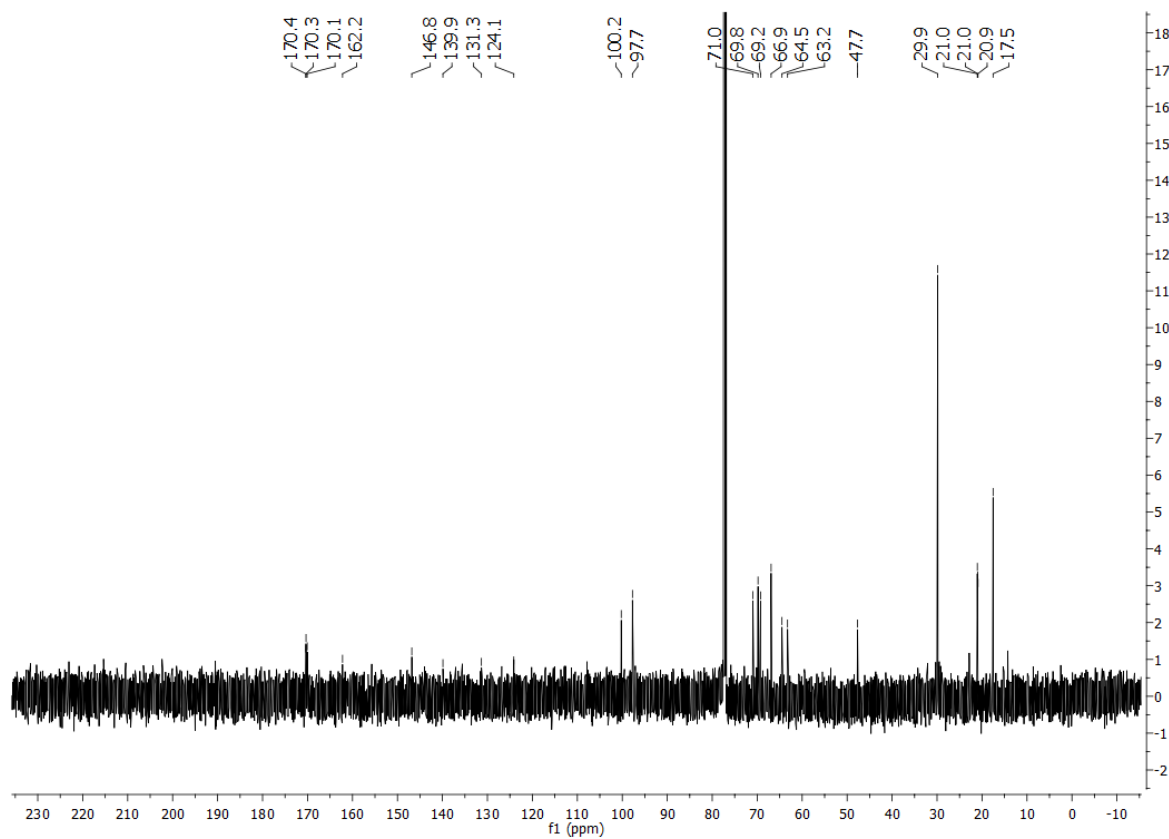

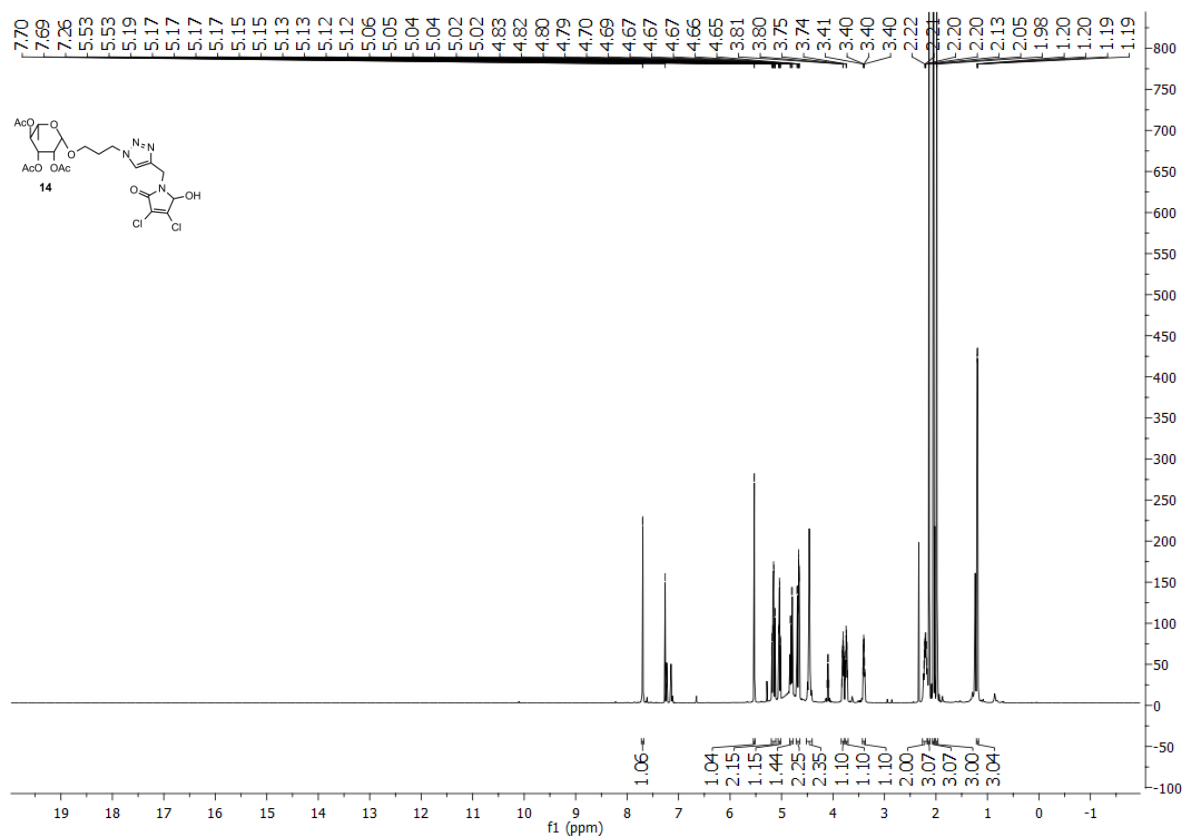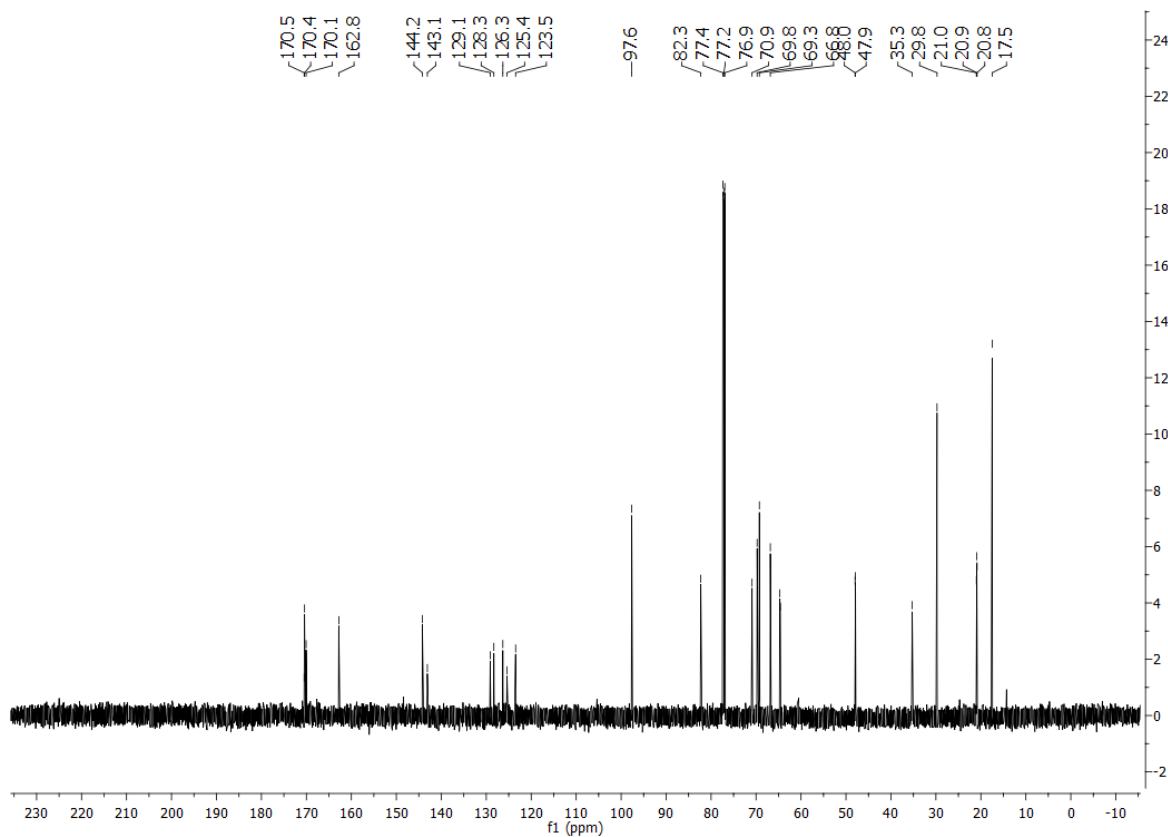

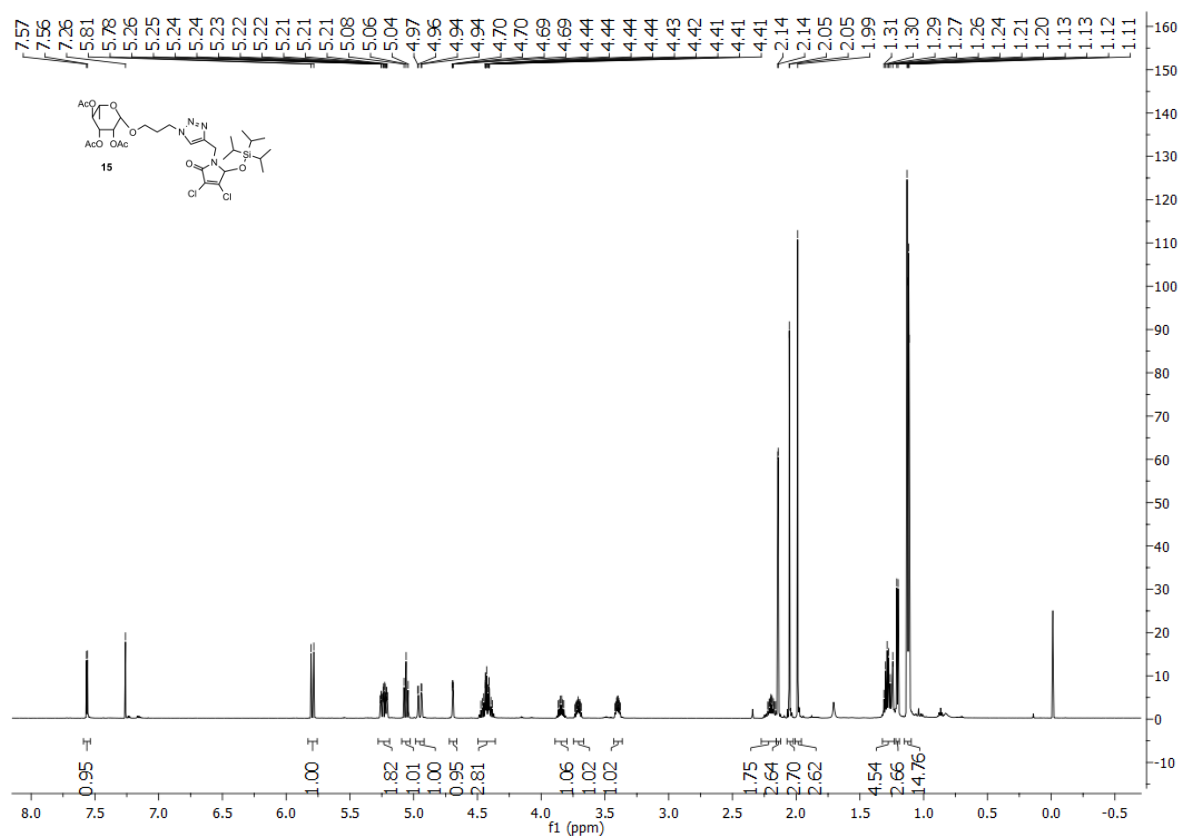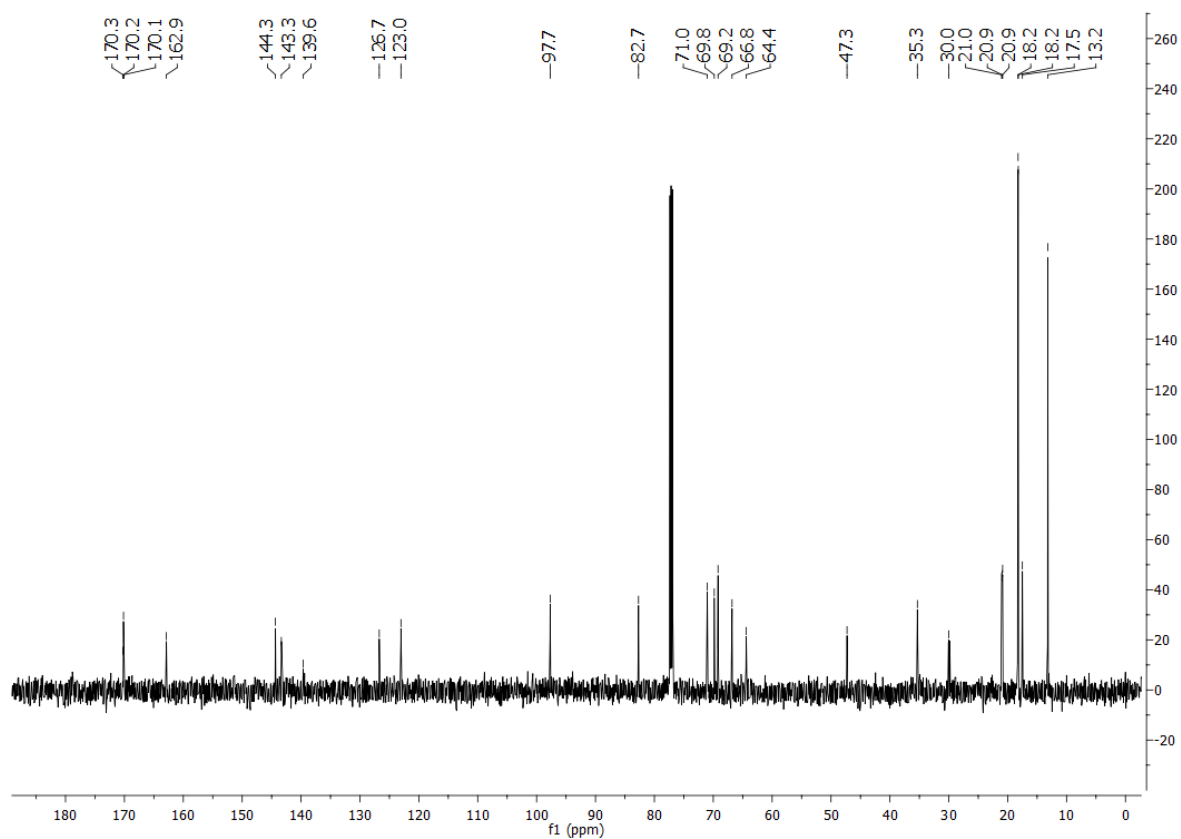

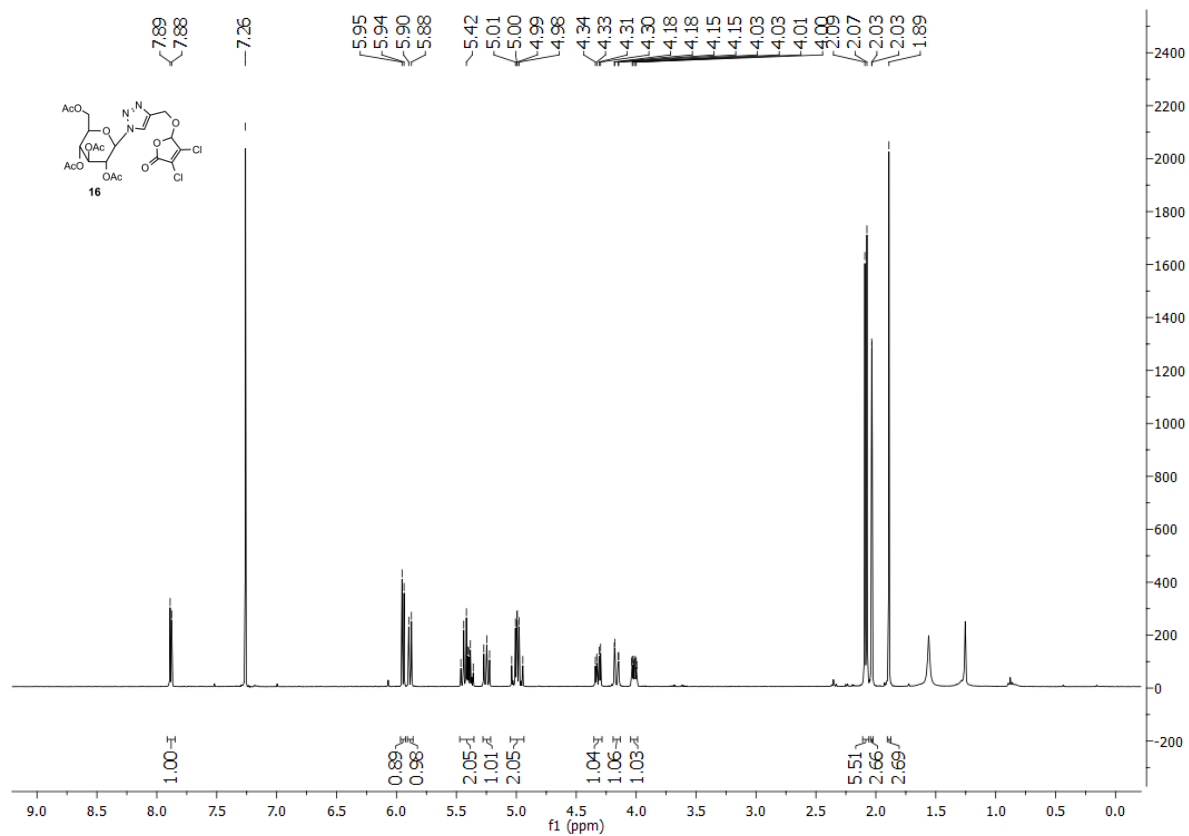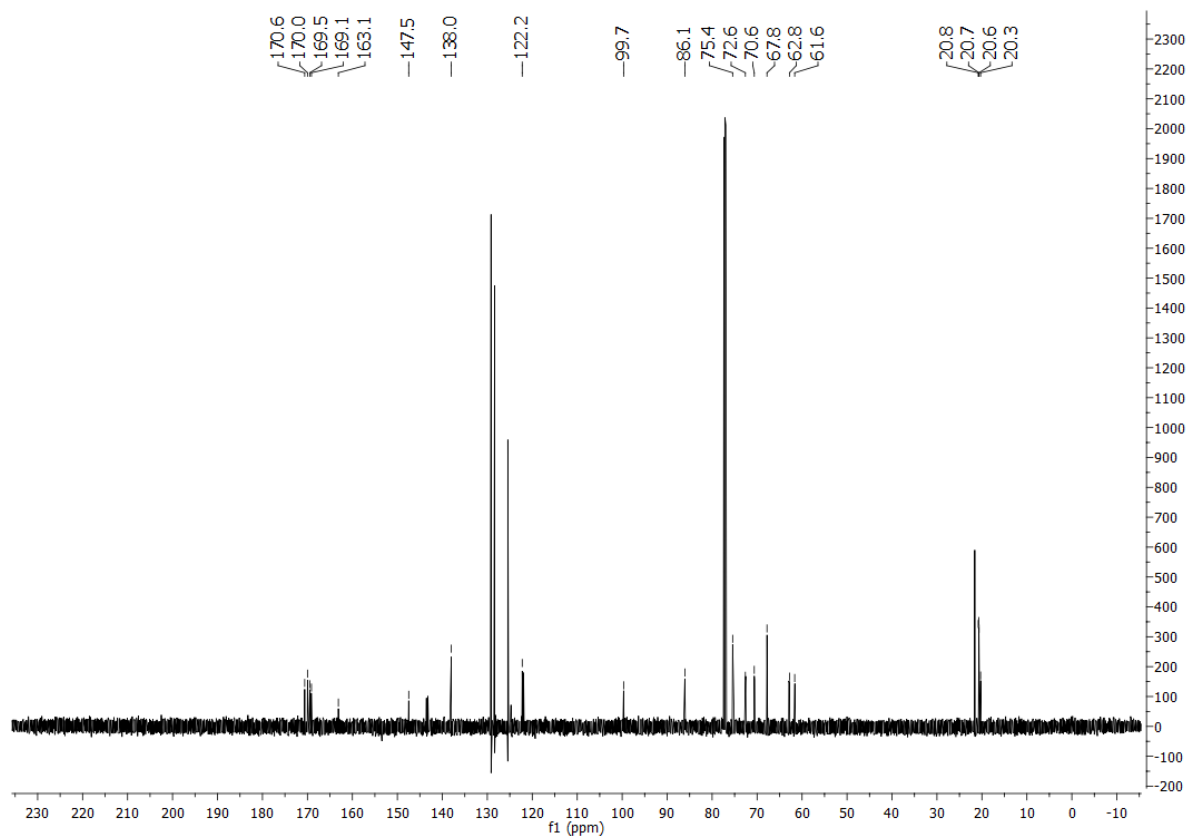



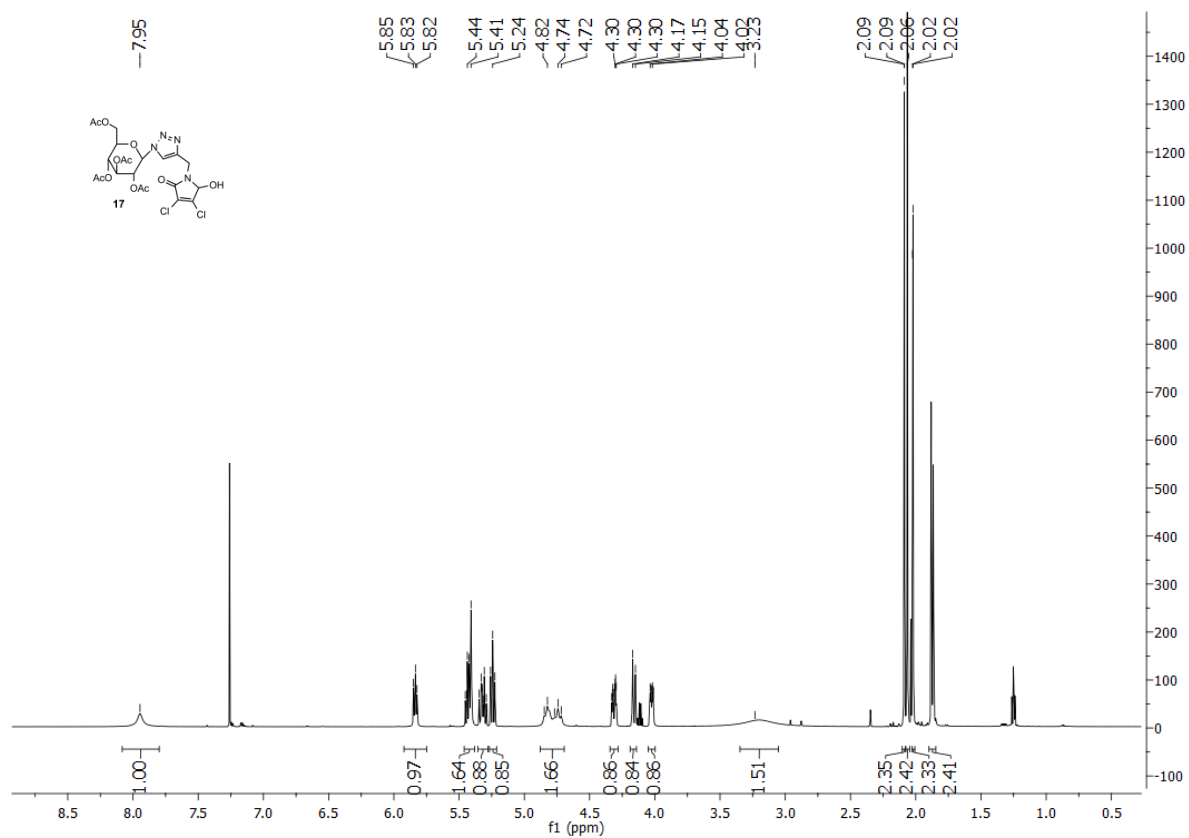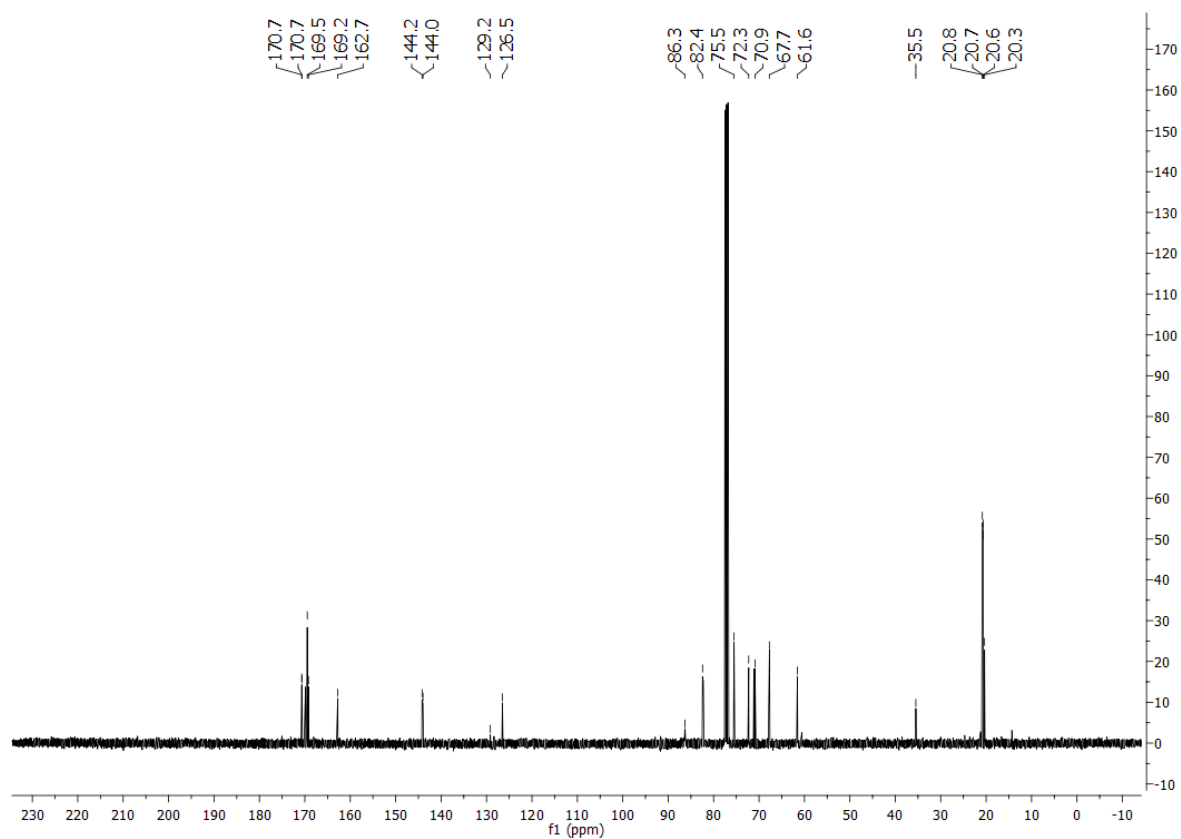

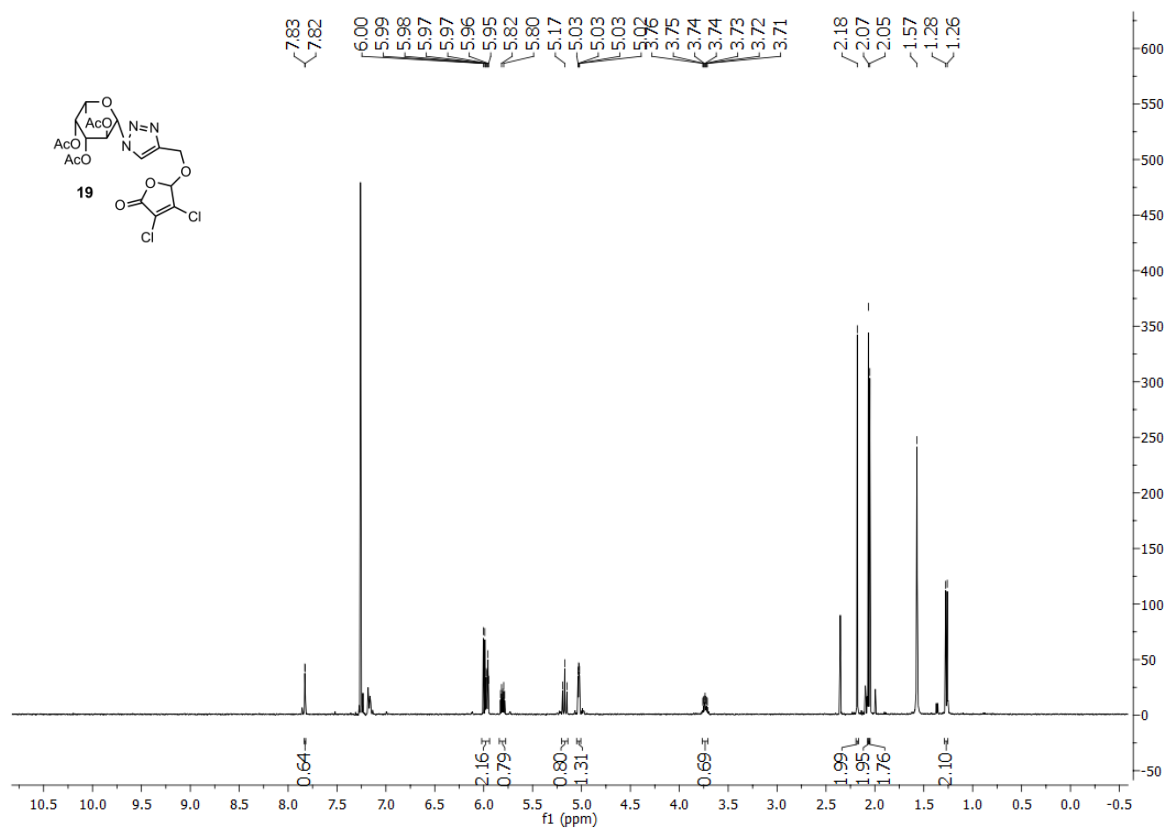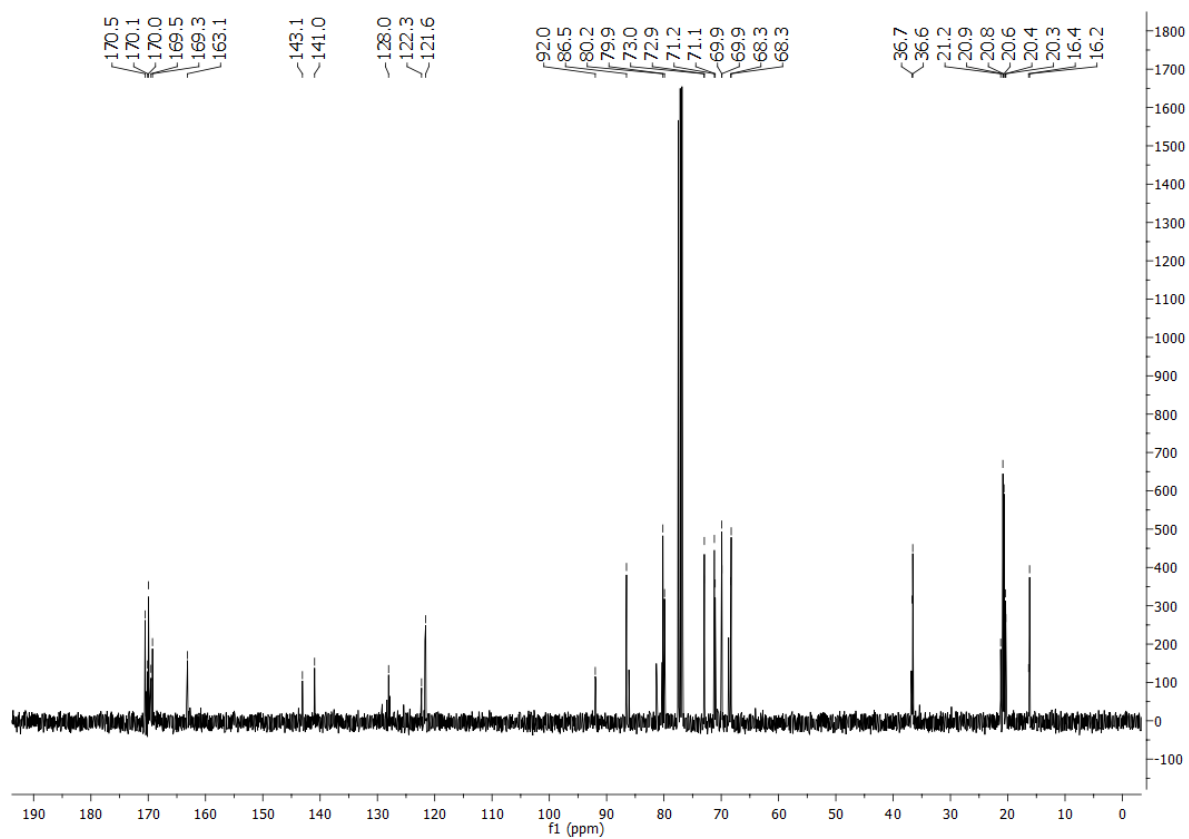

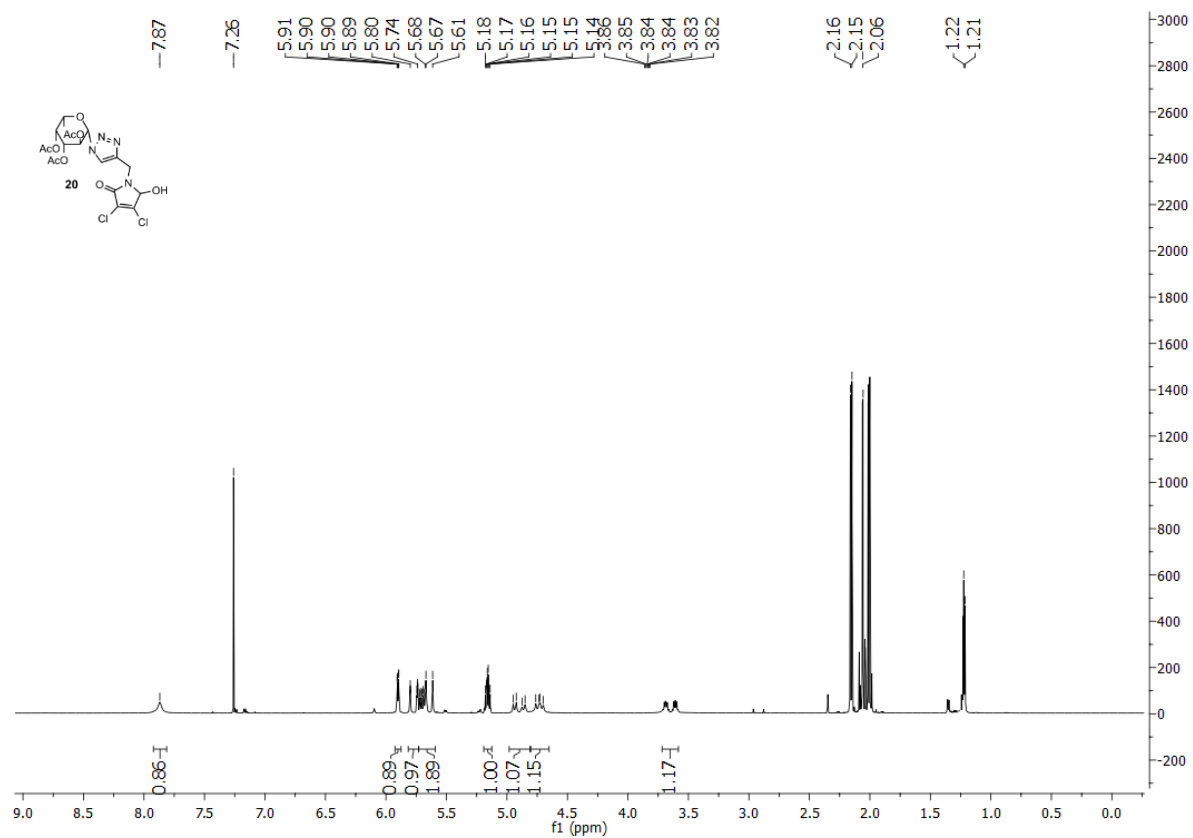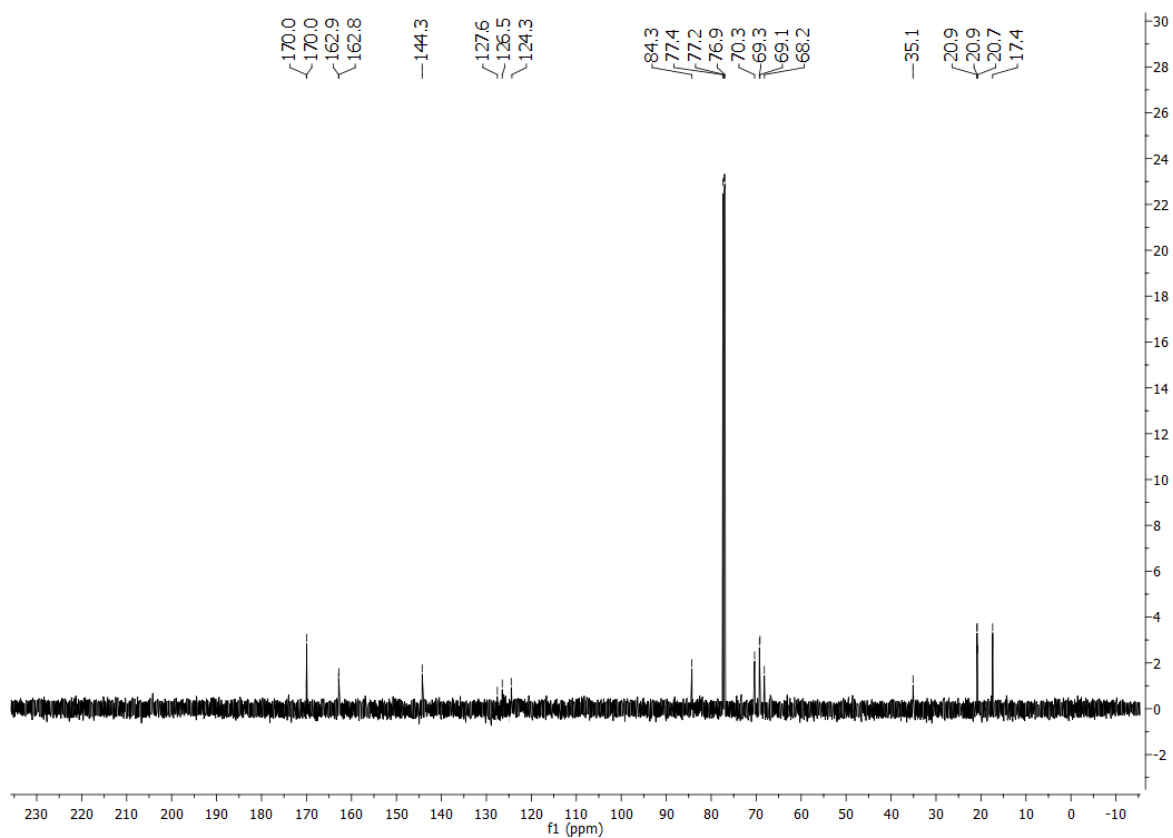

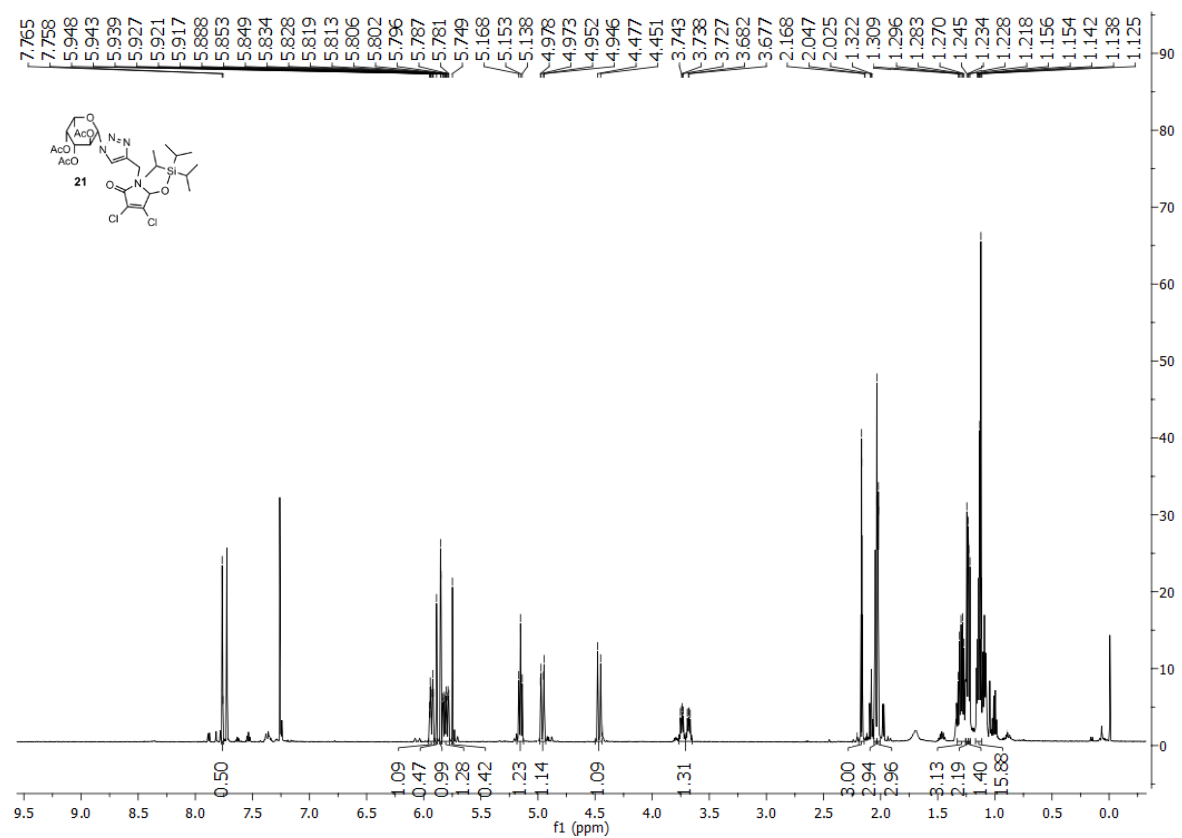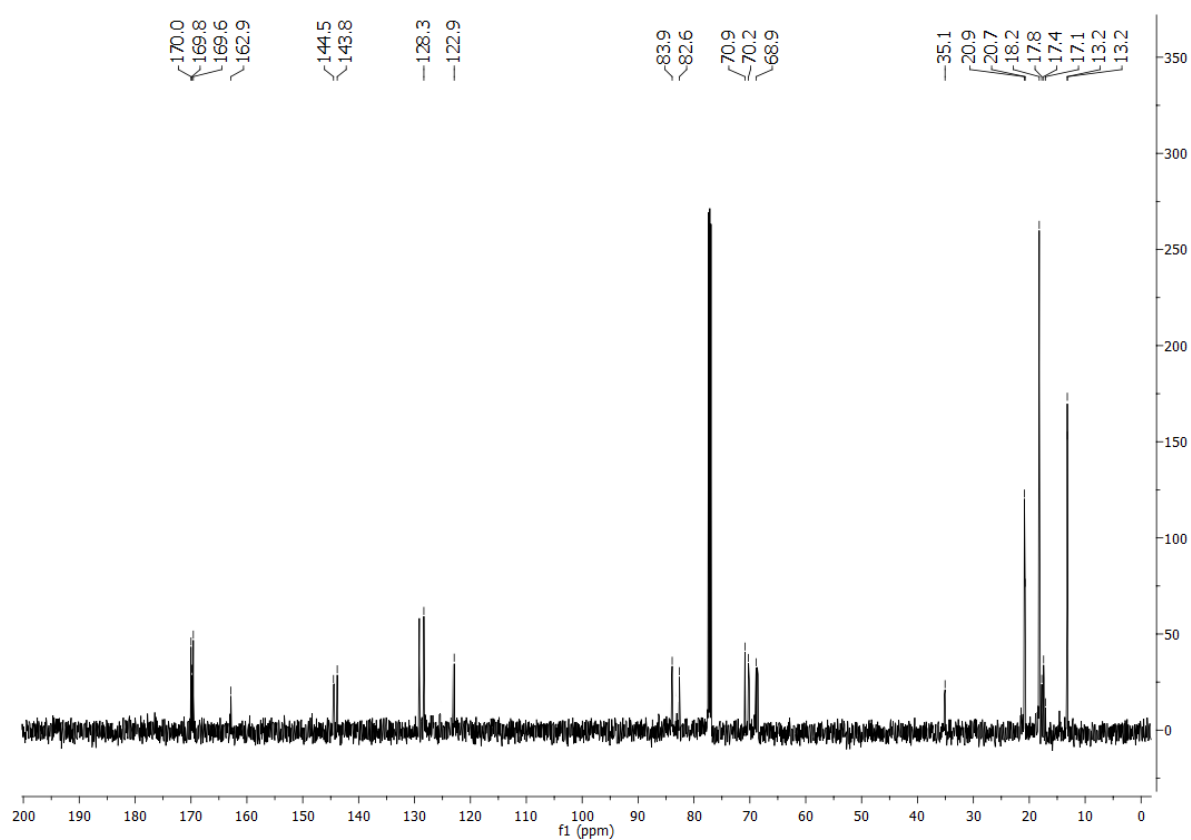

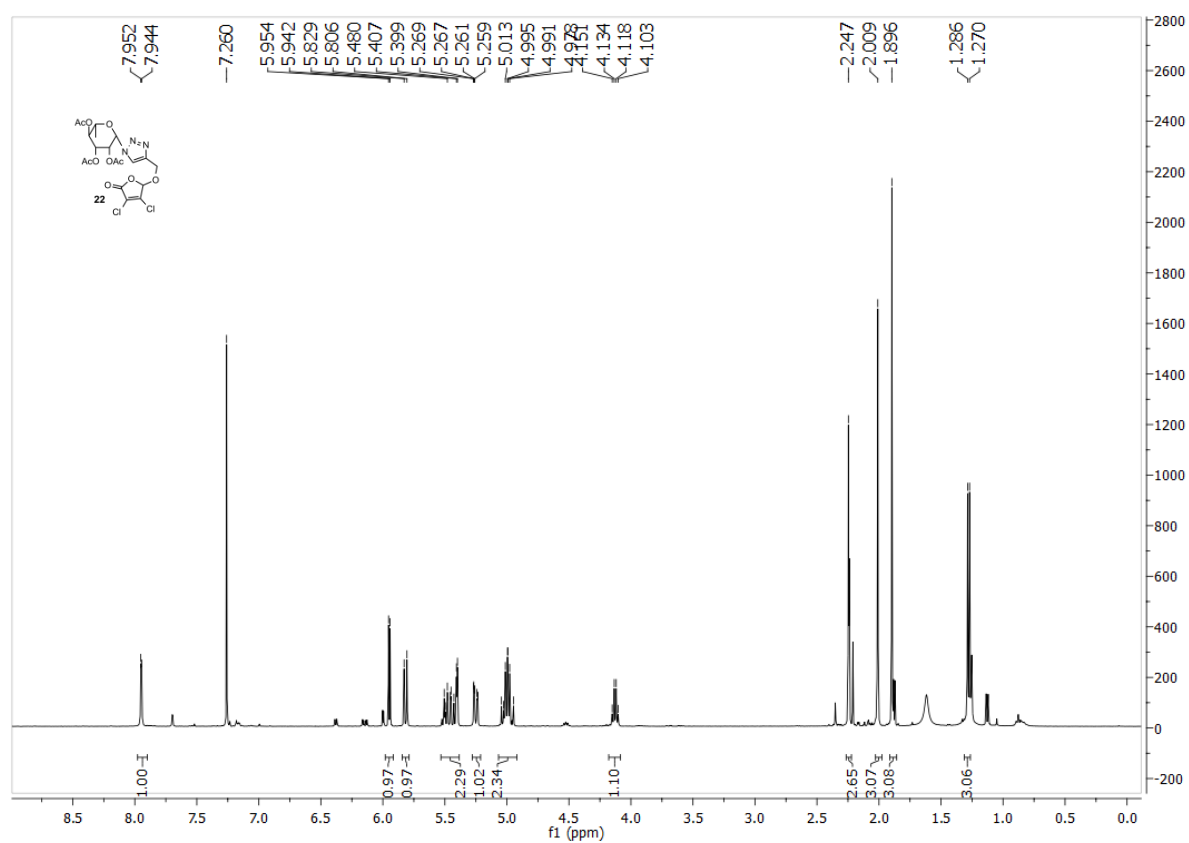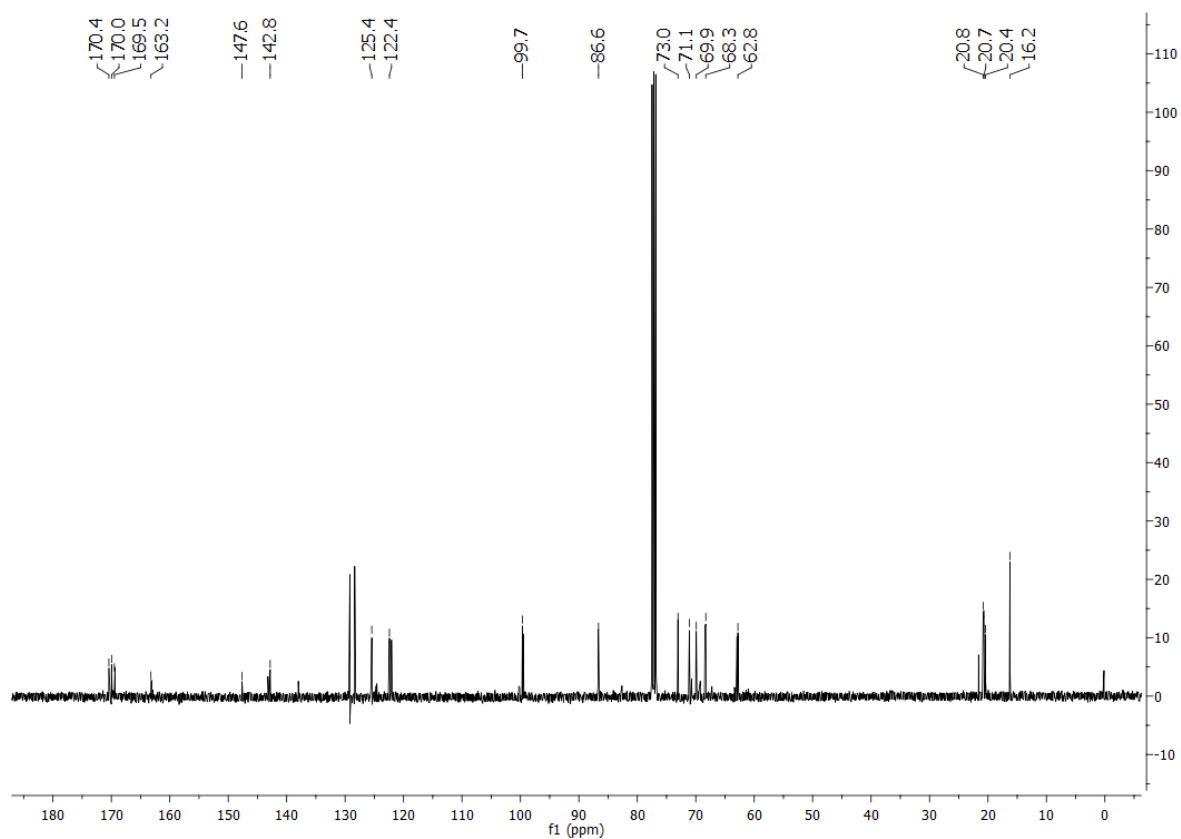

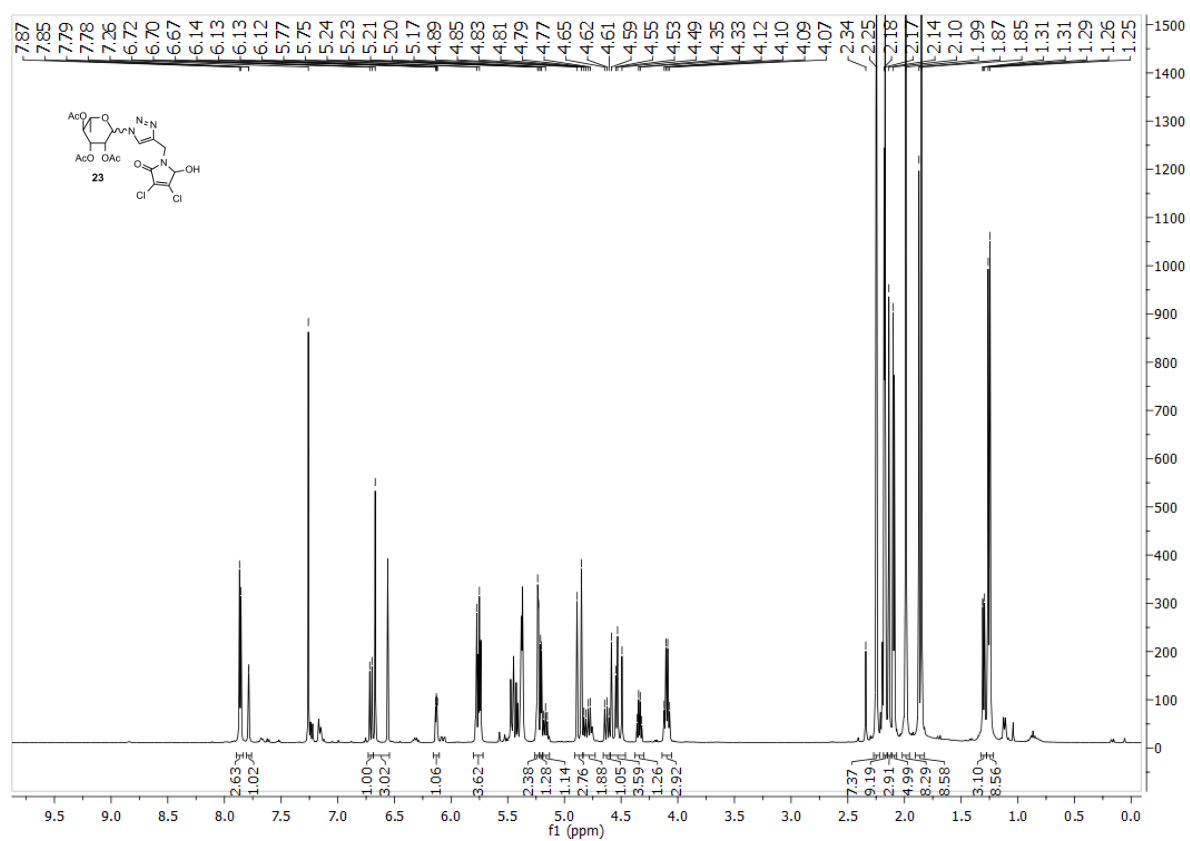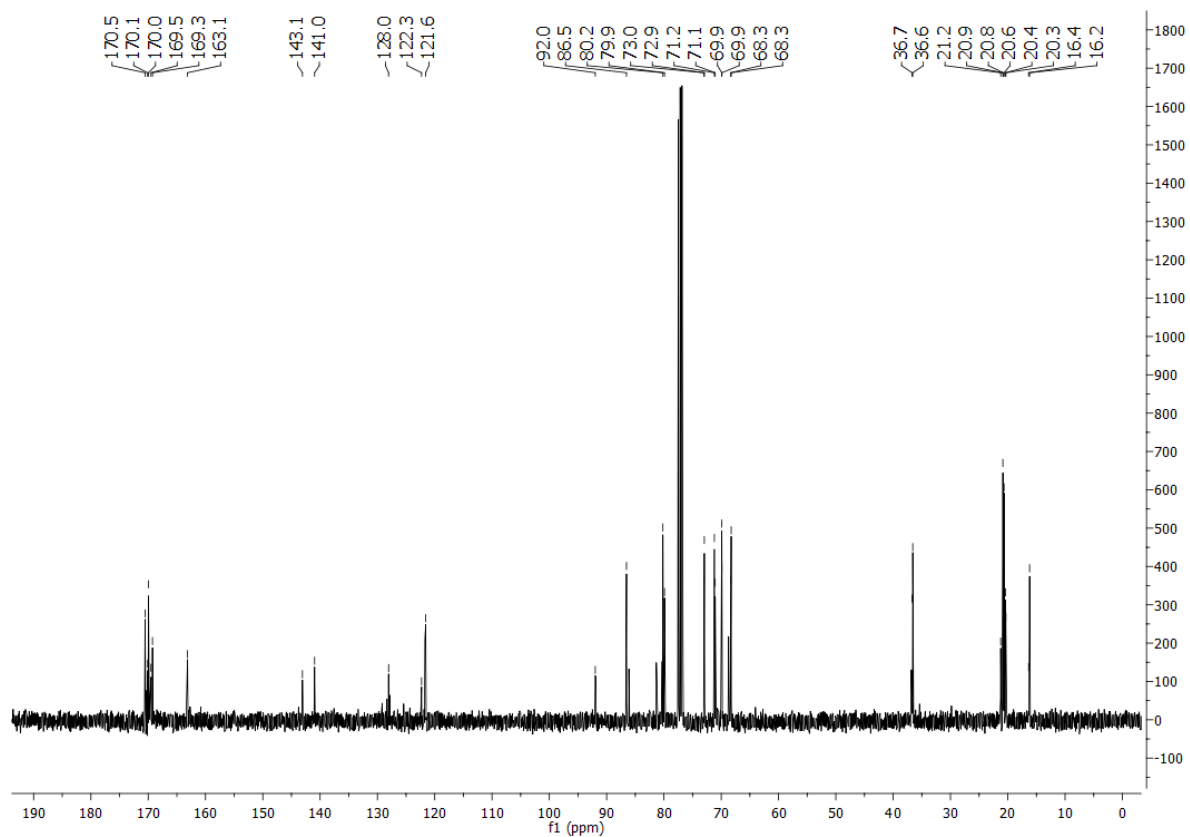

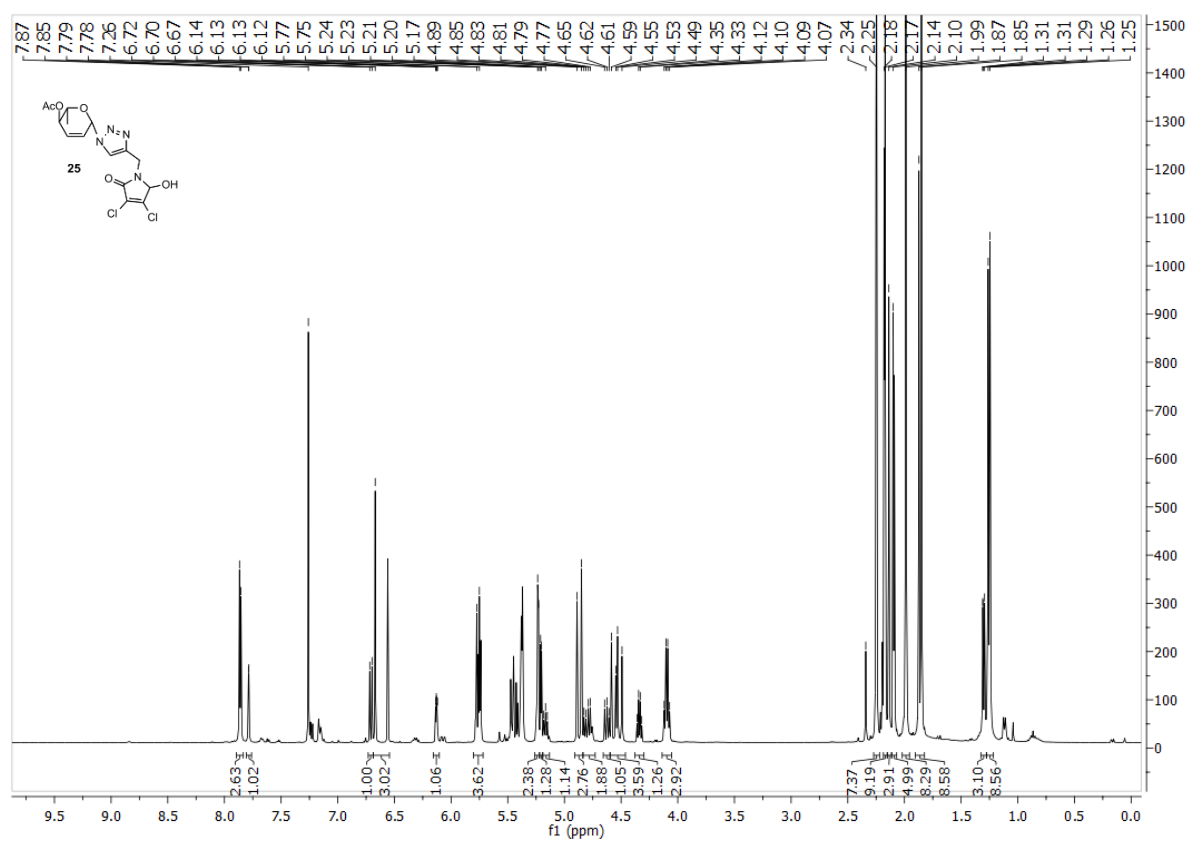

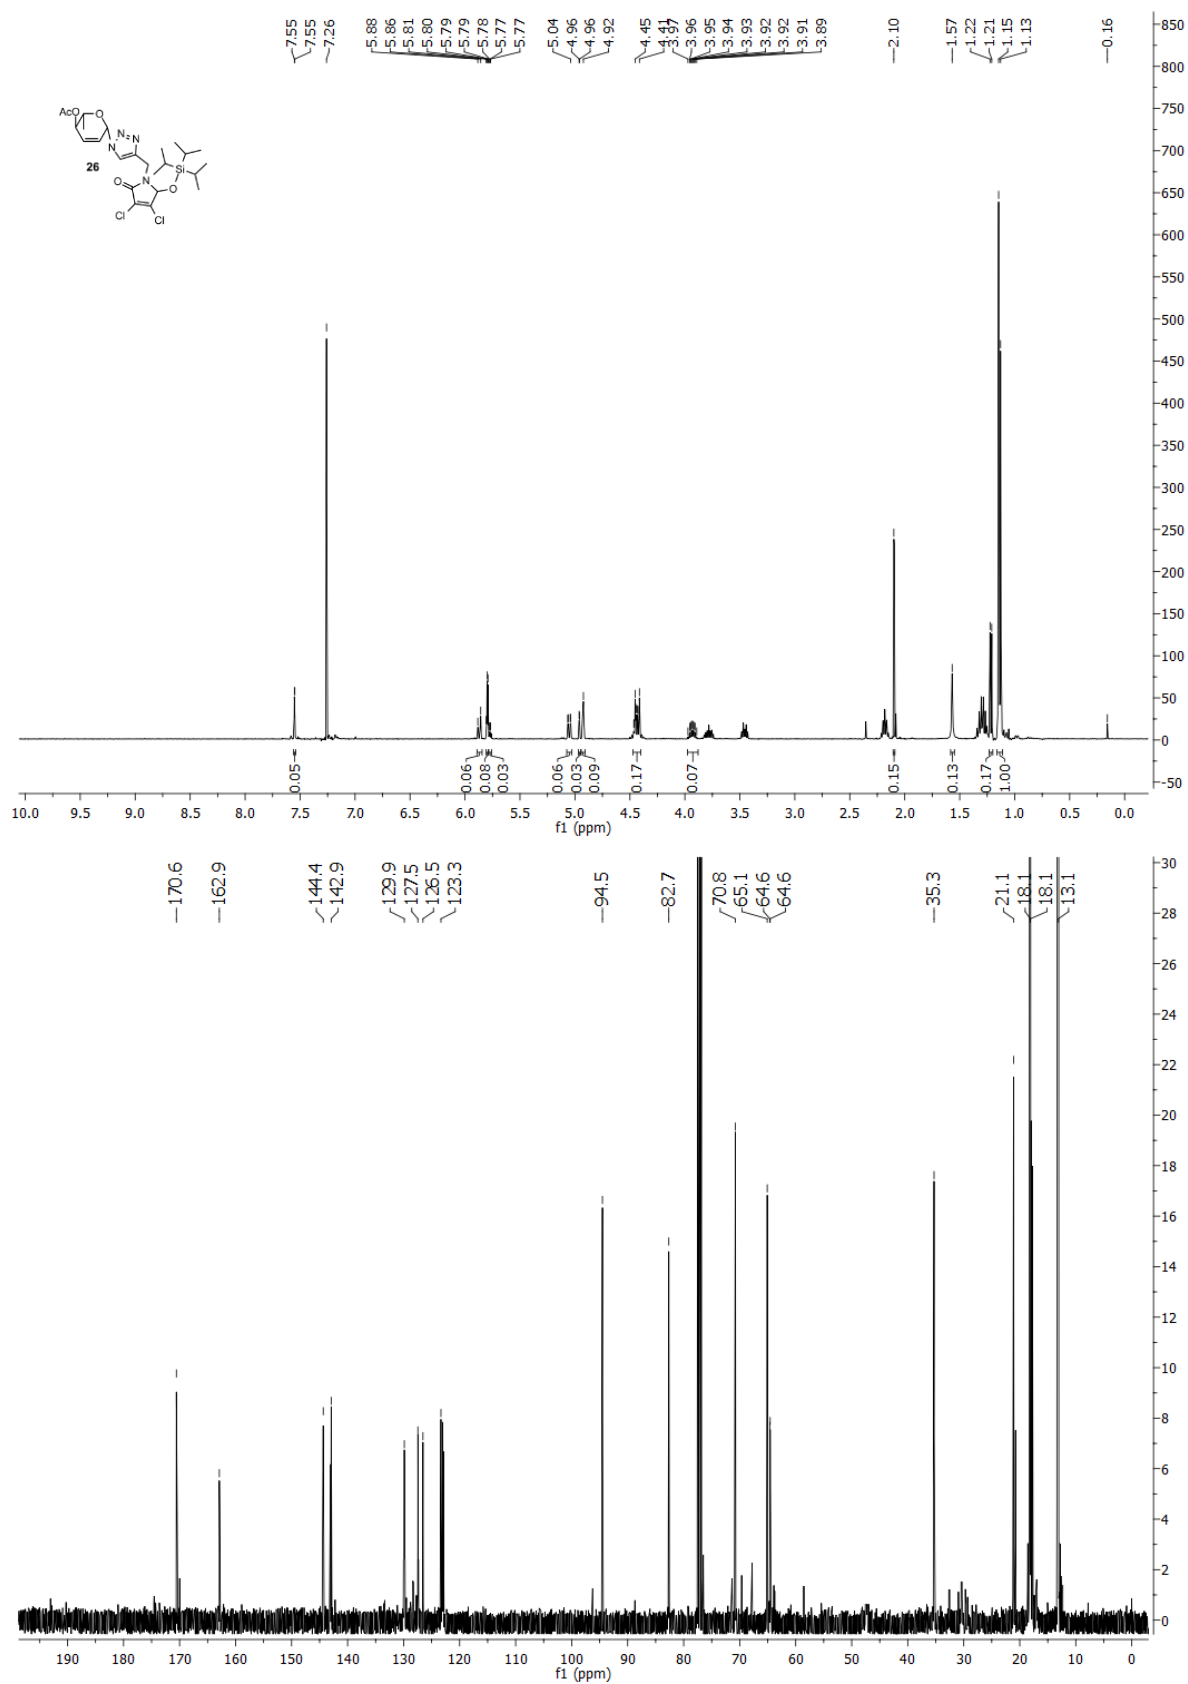



**Figure S1.** Survival fraction of HCT116 (left) and MCF7 (right) cell lines after 72-hours of incubation with tested compounds (10, 11, 12, 13, 14, 15, 16, 17, 18, 19, 20, 21, 22, 23, 24, 25, 26, respectively), evaluated by MTT assay. Results presented as mean from 3 experiments, +/- SD. Statistical significance indicated by star; evaluated by T-test, where  $p < 0.05$  (TRUE bolded under the charts).

**10**

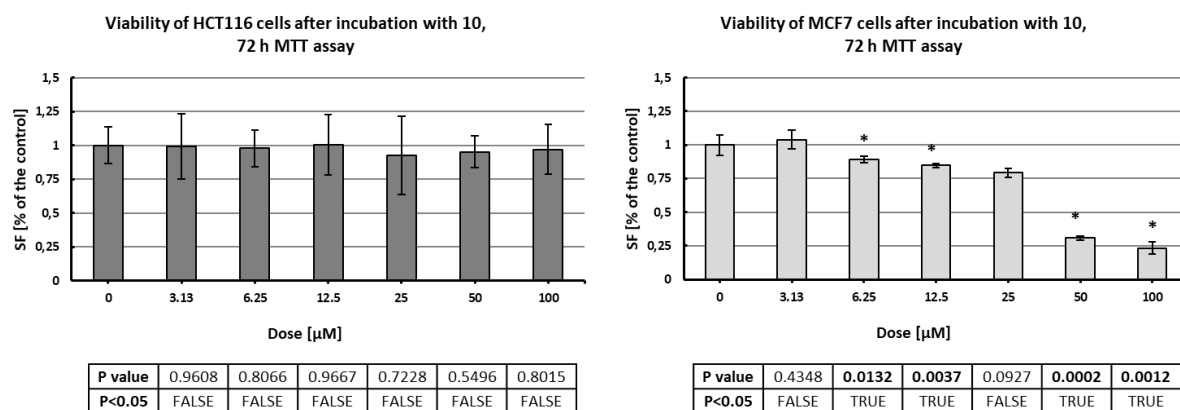

**11**

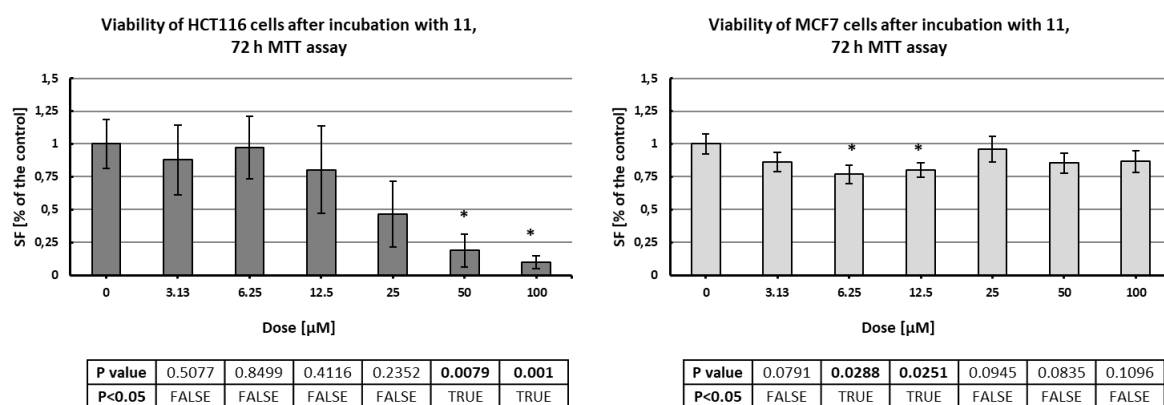

**12**

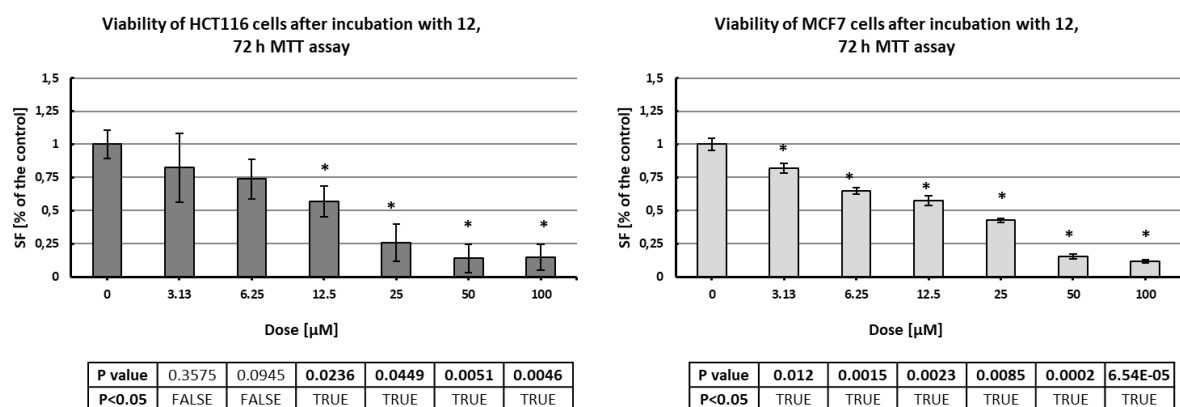

# 13

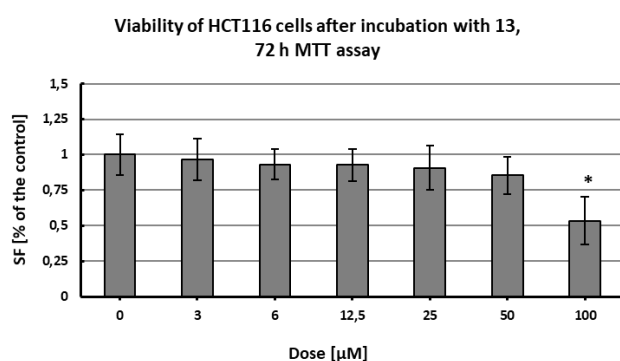

|         |        |        |        |        |        |        |
|---------|--------|--------|--------|--------|--------|--------|
| P value | 0.7367 | 0.3819 | 0.3878 | 0.8578 | 0.1933 | 0.0404 |
| P<0.05  | FALSE  | FALSE  | FALSE  | FALSE  | FALSE  | TRUE   |

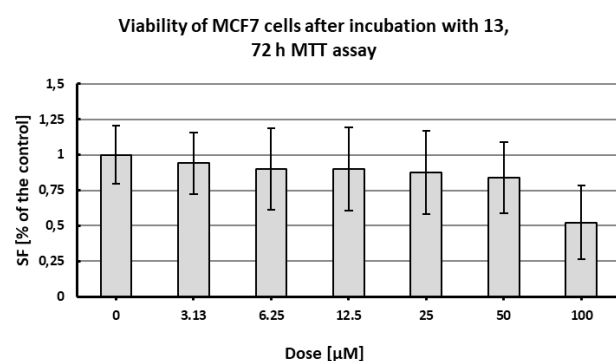

|         |        |        |        |        |        |        |
|---------|--------|--------|--------|--------|--------|--------|
| P value | 0.6847 | 0.6091 | 0.6177 | 0.9151 | 0.3798 | 0.0859 |
| P<0.05  | FALSE  | FALSE  | FALSE  | FALSE  | FALSE  | FALSE  |

# 14

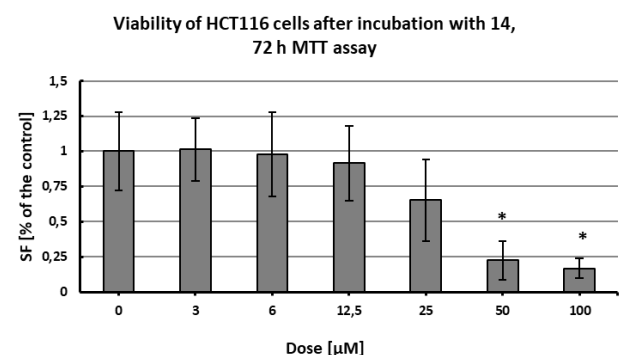

|         |        |        |        |        |        |        |
|---------|--------|--------|--------|--------|--------|--------|
| P value | 0.9229 | 0.9153 | 0.6395 | 0.3127 | 0.0103 | 0.0025 |
| P<0.05  | FALSE  | FALSE  | FALSE  | FALSE  | TRUE   | TRUE   |

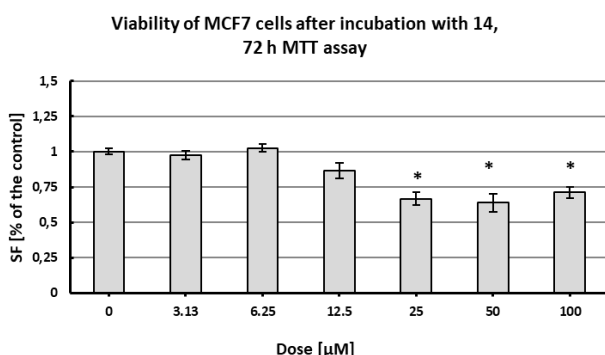

|         |        |        |        |        |        |        |
|---------|--------|--------|--------|--------|--------|--------|
| P value | 0.3197 | 0.2292 | 0.0516 | 0.0084 | 0.0102 | 0.0062 |
| P<0.05  | FALSE  | FALSE  | FALSE  | TRUE   | TRUE   | TRUE   |

# 15

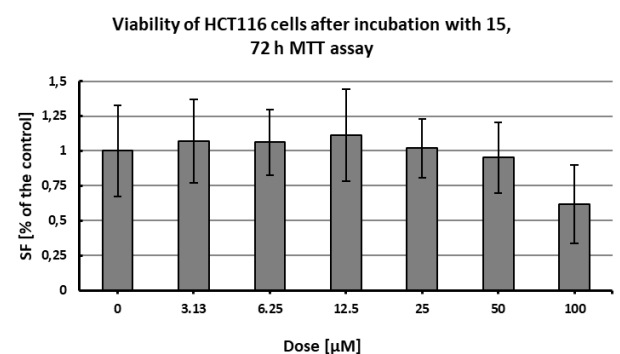

|         |        |        |        |        |        |        |
|---------|--------|--------|--------|--------|--------|--------|
| P value | 0.7276 | 0.6992 | 0.6177 | 0.7051 | 0.7771 | 0.1416 |
| P<0.05  | FALSE  | FALSE  | FALSE  | FALSE  | FALSE  | FALSE  |

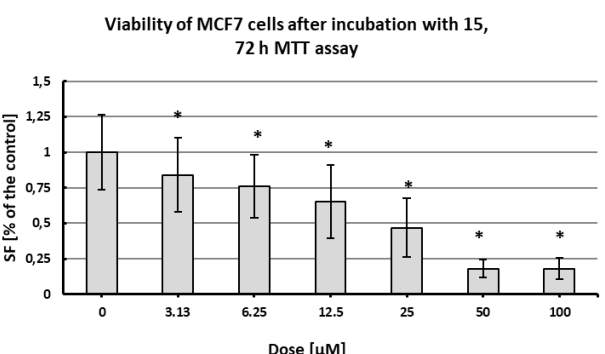

|         |        |        |        |        |        |        |
|---------|--------|--------|--------|--------|--------|--------|
| P value | 0.0454 | 0.0032 | 0.0022 | 0.0032 | 0.0003 | 0.0008 |
| P<0.05  | TRUE   | TRUE   | TRUE   | TRUE   | TRUE   | TRUE   |

## 16

Viability of HCT116 cells after incubation with 16,  
72 h MTT assay

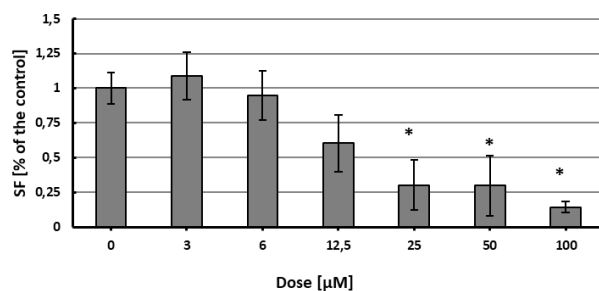

|         |        |        |        |        |        |        |
|---------|--------|--------|--------|--------|--------|--------|
| P value | 0.4746 | 0.6621 | 0.0794 | 0.0297 | 0.0308 | 0.0006 |
| P<0.05  | FALSE  | FALSE  | FALSE  | TRUE   | TRUE   | TRUE   |

Viability of MCF7 cells after incubation with 16,  
72 h MTT assay

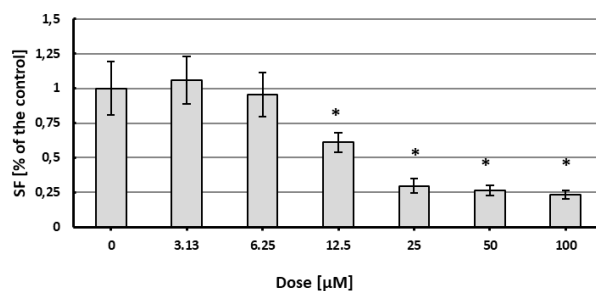

|         |       |       |        |        |        |        |
|---------|-------|-------|--------|--------|--------|--------|
| P value | 0.605 | 0.678 | 0.0111 | 0.0047 | 0.0008 | 0.0006 |
| P<0.05  | FALSE | FALSE | TRUE   | TRUE   | TRUE   | TRUE   |

## 17

Viability of HCT116 cells after incubation with 17,  
72 h MTT assay

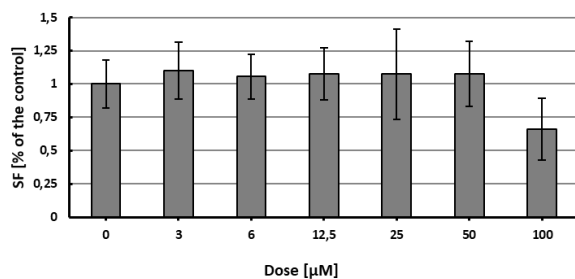

|         |        |        |        |        |        |        |
|---------|--------|--------|--------|--------|--------|--------|
| P value | 0.4987 | 0.6298 | 0.5601 | 0.9145 | 0.6436 | 0.1266 |
| P<0.05  | FALSE  | FALSE  | FALSE  | FALSE  | FALSE  | FALSE  |

Viability of MCF7 cells after incubation with 17,  
72 h MTT assay

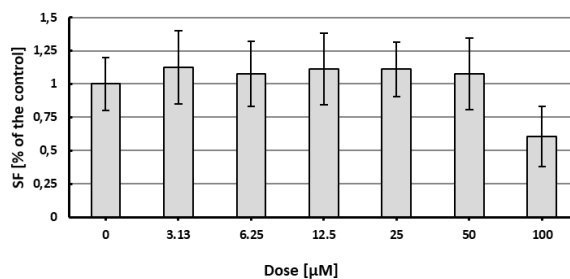

|         |        |       |        |        |        |        |
|---------|--------|-------|--------|--------|--------|--------|
| P value | 0.5099 | 0.645 | 0.5398 | 0.9943 | 0.6731 | 0.0944 |
| P<0.05  | FALSE  | FALSE | FALSE  | FALSE  | FALSE  | FALSE  |

## 18

Viability of HCT116 cells after incubation with 18,  
72 h MTT assay

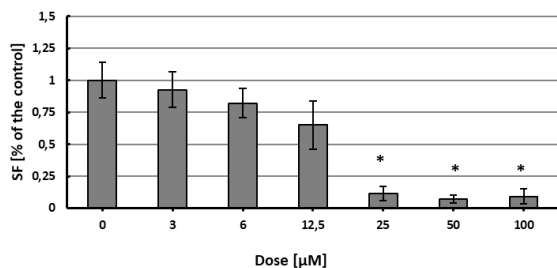

|         |        |        |        |        |        |        |
|---------|--------|--------|--------|--------|--------|--------|
| P value | 0.4606 | 0.1127 | 0.0831 | 0.0301 | 0.0004 | 0.0013 |
| P<0.05  | FALSE  | FALSE  | FALSE  | TRUE   | TRUE   | TRUE   |

Viability of MCF7 cells after incubation with 18,  
72 h MTT assay

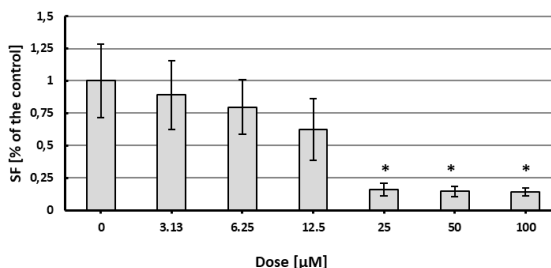

|         |        |        |        |        |        |        |
|---------|--------|--------|--------|--------|--------|--------|
| P value | 0.5506 | 0.2357 | 0.1105 | 0.0417 | 0.0006 | 0.0004 |
| P<0.05  | FALSE  | FALSE  | FALSE  | TRUE   | TRUE   | TRUE   |

**19**

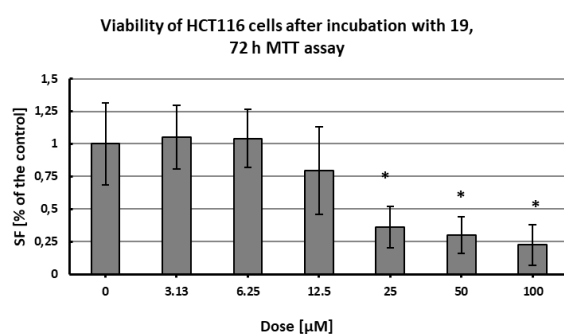

|         |        |        |       |        |        |        |
|---------|--------|--------|-------|--------|--------|--------|
| P value | 0.7433 | 0.7801 | 0.398 | 0.0414 | 0.0131 | 0.0131 |
| P<0.05  | FALSE  | FALSE  | FALSE | TRUE   | TRUE   | TRUE   |

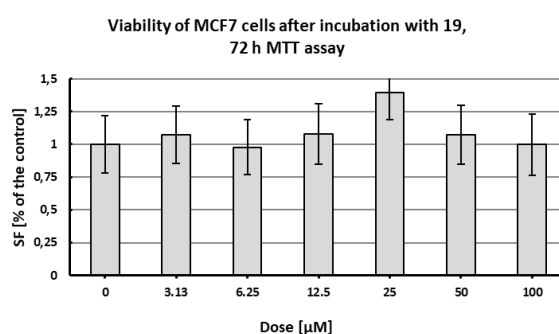

|         |        |        |        |       |        |        |
|---------|--------|--------|--------|-------|--------|--------|
| P value | 0.6316 | 0.8688 | 0.6167 | 0.151 | 0.6302 | 0.9866 |
| P<0.05  | FALSE  | FALSE  | FALSE  | FALSE | FALSE  | FALSE  |

**20**

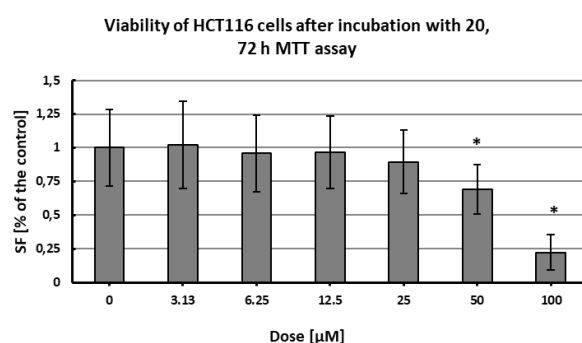

|         |        |        |        |       |        |        |
|---------|--------|--------|--------|-------|--------|--------|
| P value | 0.9207 | 0.8185 | 0.8394 | 0.748 | 0.1058 | 0.0094 |
| P<0.05  | FALSE  | FALSE  | FALSE  | FALSE | TRUE   | TRUE   |

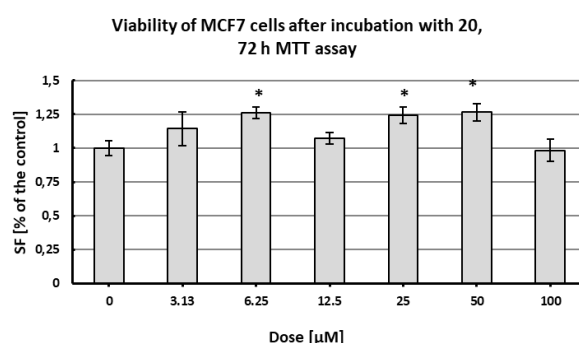

|         |        |        |       |        |        |        |
|---------|--------|--------|-------|--------|--------|--------|
| P value | 0.1818 | 0.0083 | 0.099 | 0.0207 | 0.0197 | 0.7542 |
| P<0.05  | FALSE  | TRUE   | FALSE | TRUE   | TRUE   | FALSE  |

**21**

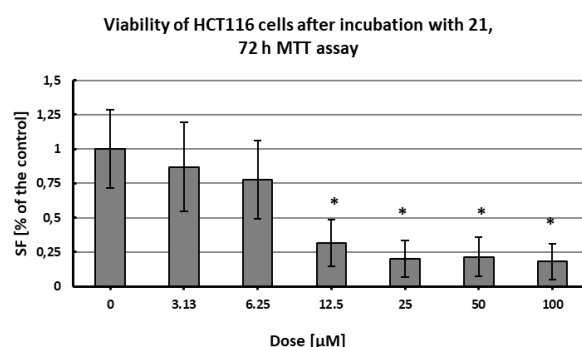

|         |        |        |        |        |        |        |
|---------|--------|--------|--------|--------|--------|--------|
| P value | 0.5579 | 0.3071 | 0.0196 | 0.0114 | 0.0109 | 0.0085 |
| P<0.05  | FALSE  | FALSE  | TRUE   | TRUE   | TRUE   | TRUE   |

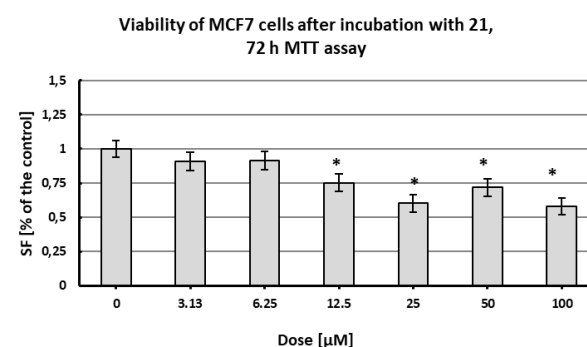

|         |        |        |       |       |        |        |
|---------|--------|--------|-------|-------|--------|--------|
| P value | 0.1321 | 0.1511 | 0.022 | 0.045 | 0.0173 | 0.0072 |
| P<0.05  | FALSE  | FALSE  | TRUE  | TRUE  | TRUE   | TRUE   |

## 22

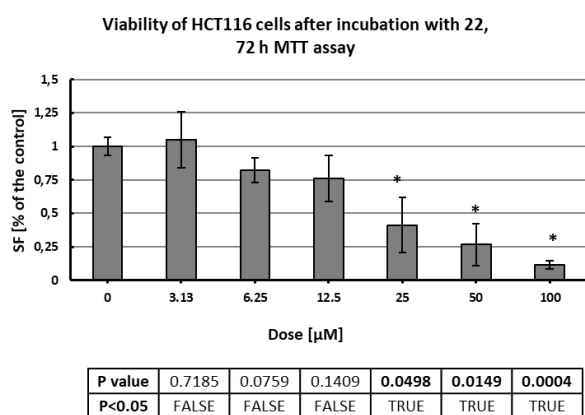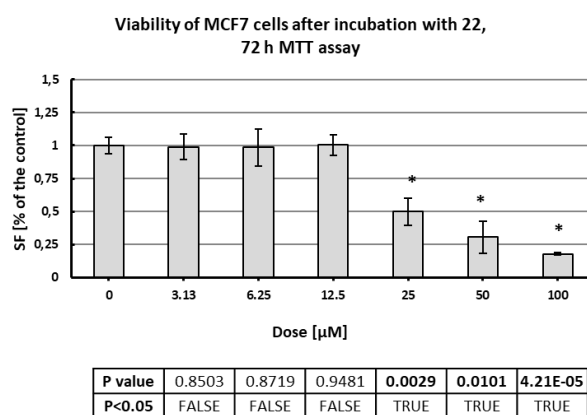

## 23

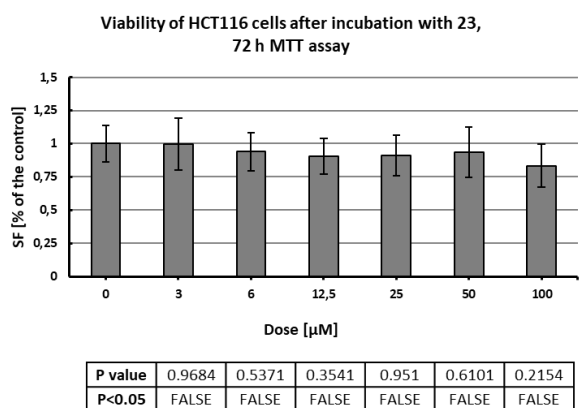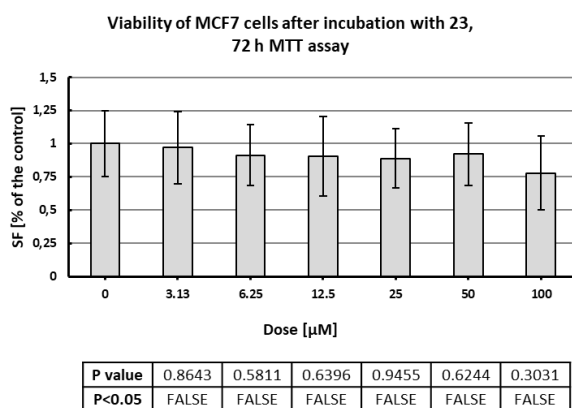

## 24

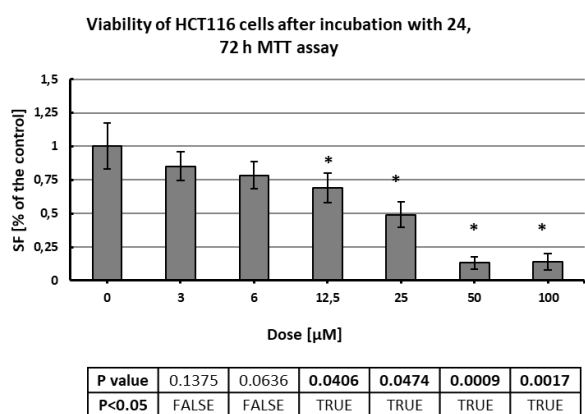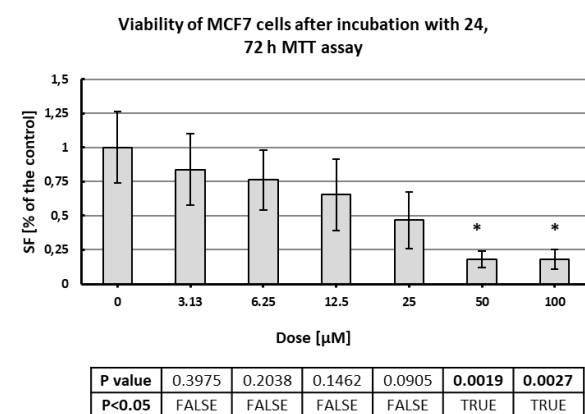

## 25

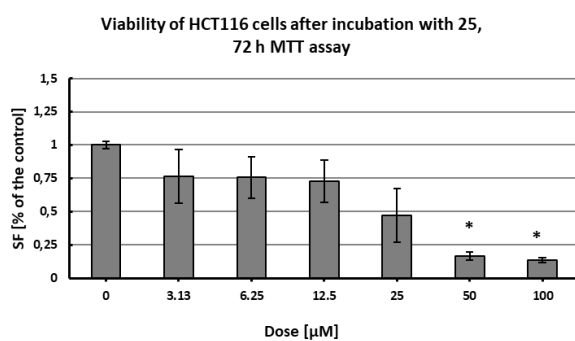

|         |        |        |        |        |        |        |
|---------|--------|--------|--------|--------|--------|--------|
| P value | 0.1813 | 0.1142 | 0.1001 | 0.1649 | 0.0005 | 0.0001 |
| P<0.05  | FALSE  | FALSE  | FALSE  | FALSE  | TRUE   | TRUE   |

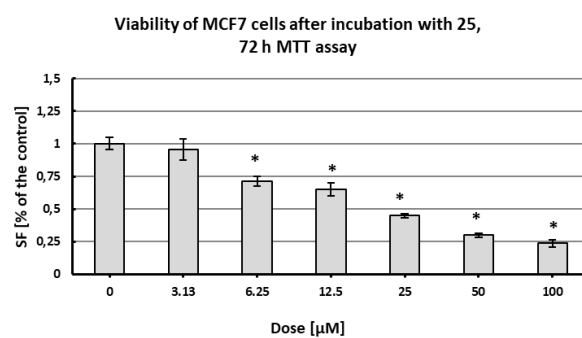

|         |        |        |        |        |        |        |
|---------|--------|--------|--------|--------|--------|--------|
| P value | 0.4322 | 0.0056 | 0.0063 | 0.0134 | 0.0002 | 0.0004 |
| P<0.05  | FALSE  | TRUE   | TRUE   | TRUE   | TRUE   | TRUE   |

## 26

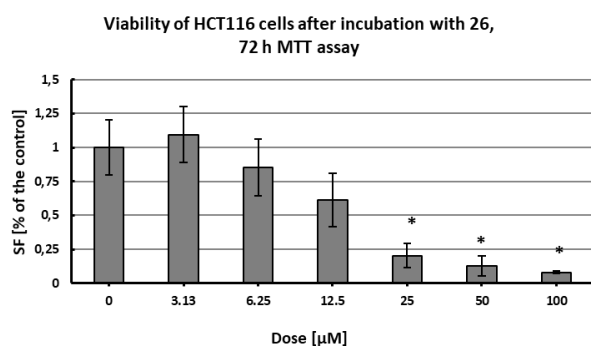

|         |        |        |        |        |        |          |
|---------|--------|--------|--------|--------|--------|----------|
| P value | 0.5142 | 0.3536 | 0.0764 | 0.0509 | 0.0023 | 3.42E-05 |
| P<0.05  | FALSE  | FALSE  | FALSE  | TRUE   | TRUE   | TRUE     |

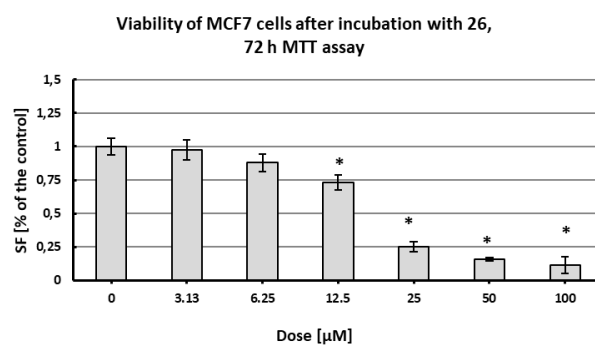

|         |        |        |       |        |          |        |
|---------|--------|--------|-------|--------|----------|--------|
| P value | 0.6008 | 0.0824 | 0.015 | 0.0006 | 9.01E-05 | 0.0015 |
| P<0.05  | FALSE  | FALSE  | TRUE  | TRUE   | TRUE     | TRUE   |
